# Supplementary material for: Cytotoxic Phenylpropanoid Derivatives and Alkaloids from the Flowers of Pancratium maritimum L
Source: MDPI journal article supplement (doi:10.3390/plants11040476), 2022-02-09

# Supporting Information

|                                                                                      |    |
|--------------------------------------------------------------------------------------|----|
| Figure S1. (+)-HRESIMS spectrum of compound <b>1</b> .....                           | 1  |
| Figure S2. <sup>1</sup> H NMR spectrum of compound <b>1</b> .....                    | 2  |
| Figure S3. Expansion of <sup>1</sup> H NMR spectrum of compound <b>1</b> .....       | 2  |
| Figure S4. <sup>13</sup> C NMR spectrum of compound <b>1</b> .....                   | 3  |
| Figure S5. DEPT spectrum of compound <b>1</b> .....                                  | 3  |
| Figure S6. COSY spectrum of compound <b>1</b> .....                                  | 4  |
| Figure S7. Multiplicity-edited HSQC spectrum of compound <b>1</b> .....              | 4  |
| Figure S8. <sup>1</sup> H- <sup>13</sup> C HMBC spectrum of compound <b>1</b> .....  | 5  |
| Figure S9. (+)-HRESIMS spectrum of compound <b>2</b> .....                           | 6  |
| Figure S10. <sup>1</sup> H NMR spectrum of compound <b>2</b> .....                   | 7  |
| Figure S11. Expansion of <sup>1</sup> H NMR spectrum of compound <b>2</b> .....      | 7  |
| Figure S12. <sup>13</sup> C NMR spectrum of compound <b>2</b> .....                  | 8  |
| Figure S13. DEPT spectrum of compound <b>2</b> .....                                 | 8  |
| Figure S14. COSY spectrum of compound <b>2</b> .....                                 | 9  |
| Figure S15. Multiplicity-edited HSQC spectrum of compound <b>2</b> .....             | 9  |
| Figure S16. <sup>1</sup> H- <sup>13</sup> C HMBC spectrum of compound <b>2</b> ..... | 10 |
| Figure S17. (+)-HRESIMS spectrum of compound <b>3</b> .....                          | 11 |
| Figure S18. <sup>1</sup> H NMR spectrum of compound <b>3</b> .....                   | 12 |
| Figure S19. Expansion of <sup>1</sup> H NMR spectrum of compound <b>3</b> .....      | 12 |
| Figure S20. <sup>13</sup> C NMR spectrum of compound <b>3</b> .....                  | 13 |
| Figure S21. DEPT spectrum of compound <b>3</b> .....                                 | 13 |
| Figure S22. COSY spectrum of compound <b>3</b> .....                                 | 14 |
| Figure S23. Multiplicity-edited HSQC spectrum of compound <b>3</b> .....             | 14 |
| Figure S24. <sup>1</sup> H- <sup>13</sup> C HMBC spectrum of compound <b>3</b> ..... | 15 |
| Figure S25. (+)-HRESIMS spectrum of compound <b>4</b> .....                          | 16 |
| Figure S26. <sup>1</sup> H NMR spectrum of compound <b>4</b> .....                   | 17 |
| Figure S27. <sup>13</sup> C NMR spectrum of compound <b>4</b> .....                  | 18 |
| Figure S28. (+)-HRESIMS spectrum of compound <b>5</b> .....                          | 19 |
| Figure S29. <sup>1</sup> H NMR spectrum of compound <b>5</b> .....                   | 20 |
| Figure S30. <sup>13</sup> C NMR spectrum of compound <b>5</b> .....                  | 21 |
| Figure S31. (+)-HRESIMS spectrum of compound <b>6</b> .....                          | 22 |
| Figure S32. <sup>1</sup> H NMR spectrum of compound <b>6</b> .....                   | 23 |
| Figure S33. <sup>13</sup> C NMR spectrum of compound <b>6</b> .....                  | 24 |
| Figure S34. (+)-HRESIMS spectrum of compound <b>7</b> .....                          | 25 |
| Figure S35. <sup>1</sup> H NMR spectrum of compound <b>7</b> .....                   | 26 |
| Figure S36. <sup>13</sup> C NMR spectrum of compound <b>7</b> .....                  | 27 |
| Figure S37. HPLC purification of Fraction C .....                                    | 28 |
| Figure S38. HPLC purification of Fraction D .....                                    | 28 |
| Figure S39. HPLC purification of Fraction E .....                                    | 29 |

**Figure S1.** (+)-HRESIMS spectrum of compound **1**.

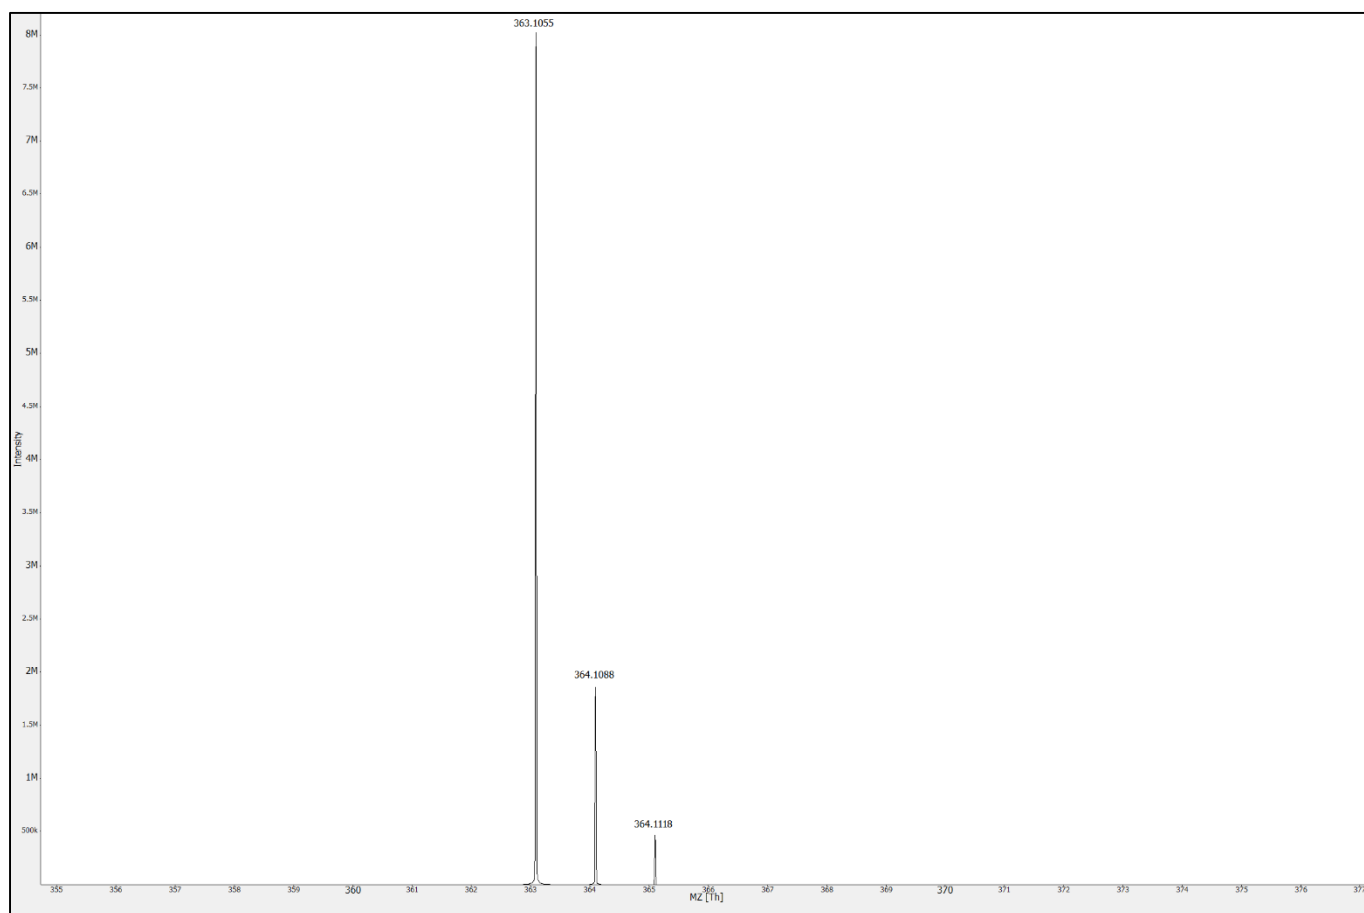

**Figure S2.**  $^1\text{H}$  NMR spectrum of compound **1** ( $\text{CD}_3\text{OD}$ ).

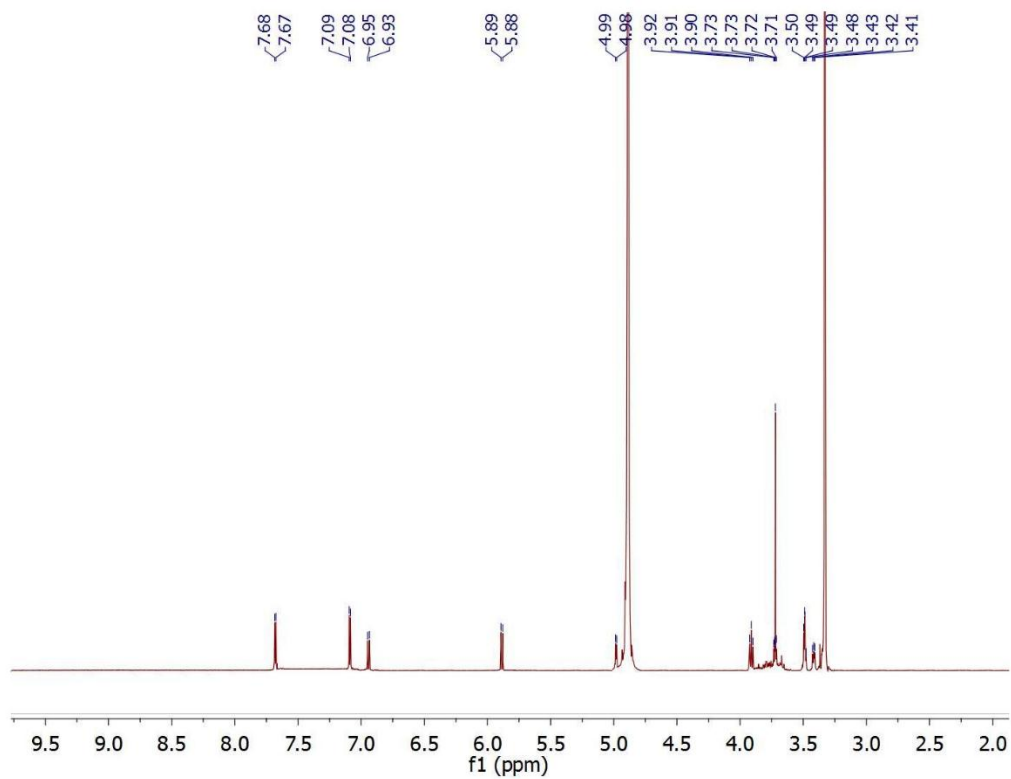

**Figure S3.** Expansion of  $^1\text{H}$  NMR spectrum of compound **1** ( $\text{CD}_3\text{OD}$ ).

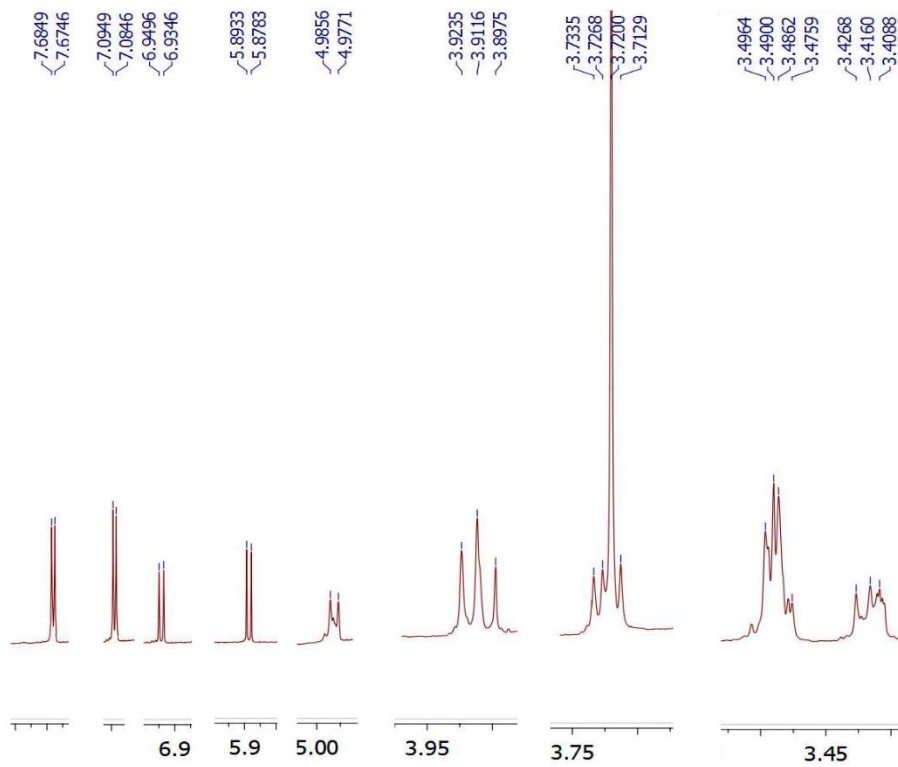

**Figure S4.**  $^{13}\text{C}$  NMR spectrum of compound **1** ( $\text{CD}_3\text{OD}$ ).

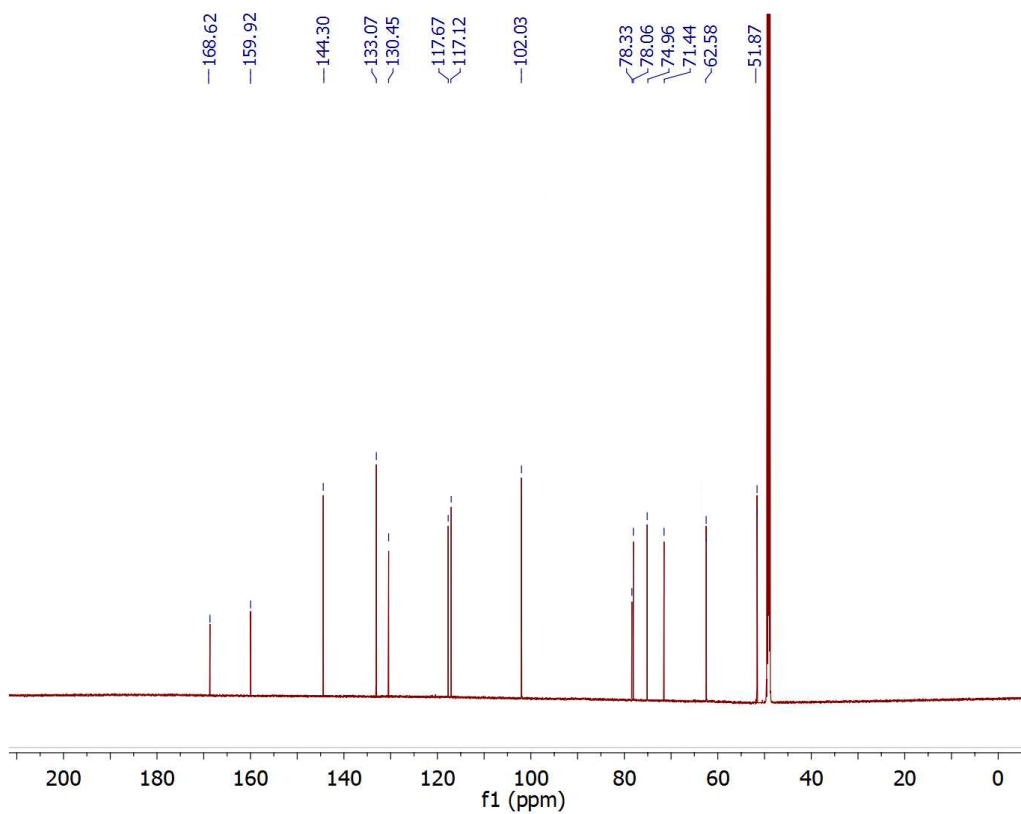

**Figure S5.** DEPT spectrum of compound **1** ( $\text{CD}_3\text{OD}$ ).

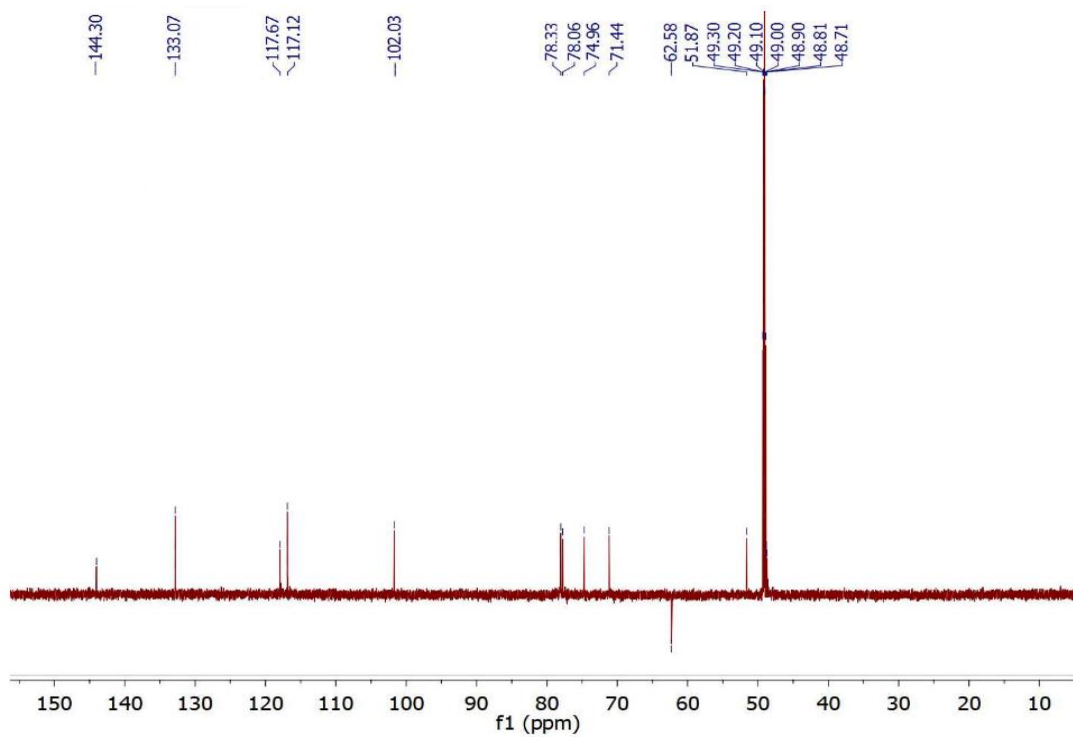

**Figure S6.** COSY spectrum of compound **1** (CD<sub>3</sub>OD).

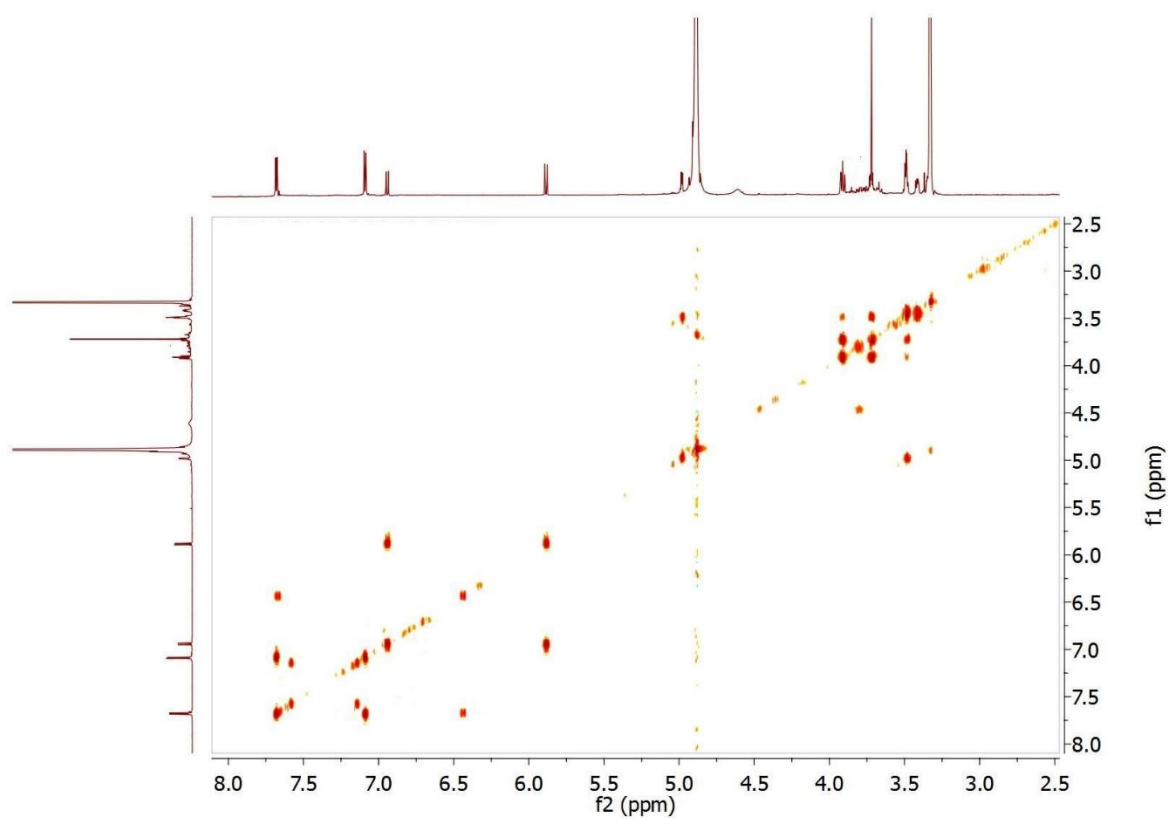

**Figure S7.** Multiplicity-edited HSQC spectrum of compound **1** (CD<sub>3</sub>OD).

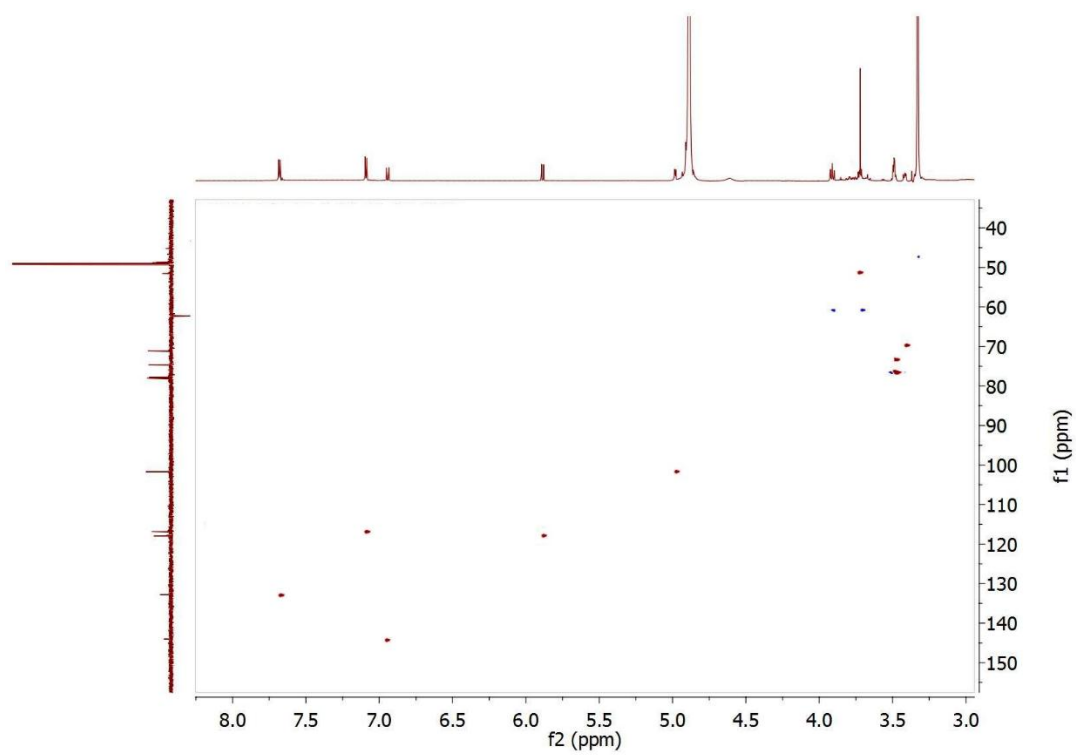

**Figure S8.**  $^1\text{H}$ - $^{13}\text{C}$  HMBC spectrum of compound **1** ( $\text{CD}_3\text{OD}$ ).

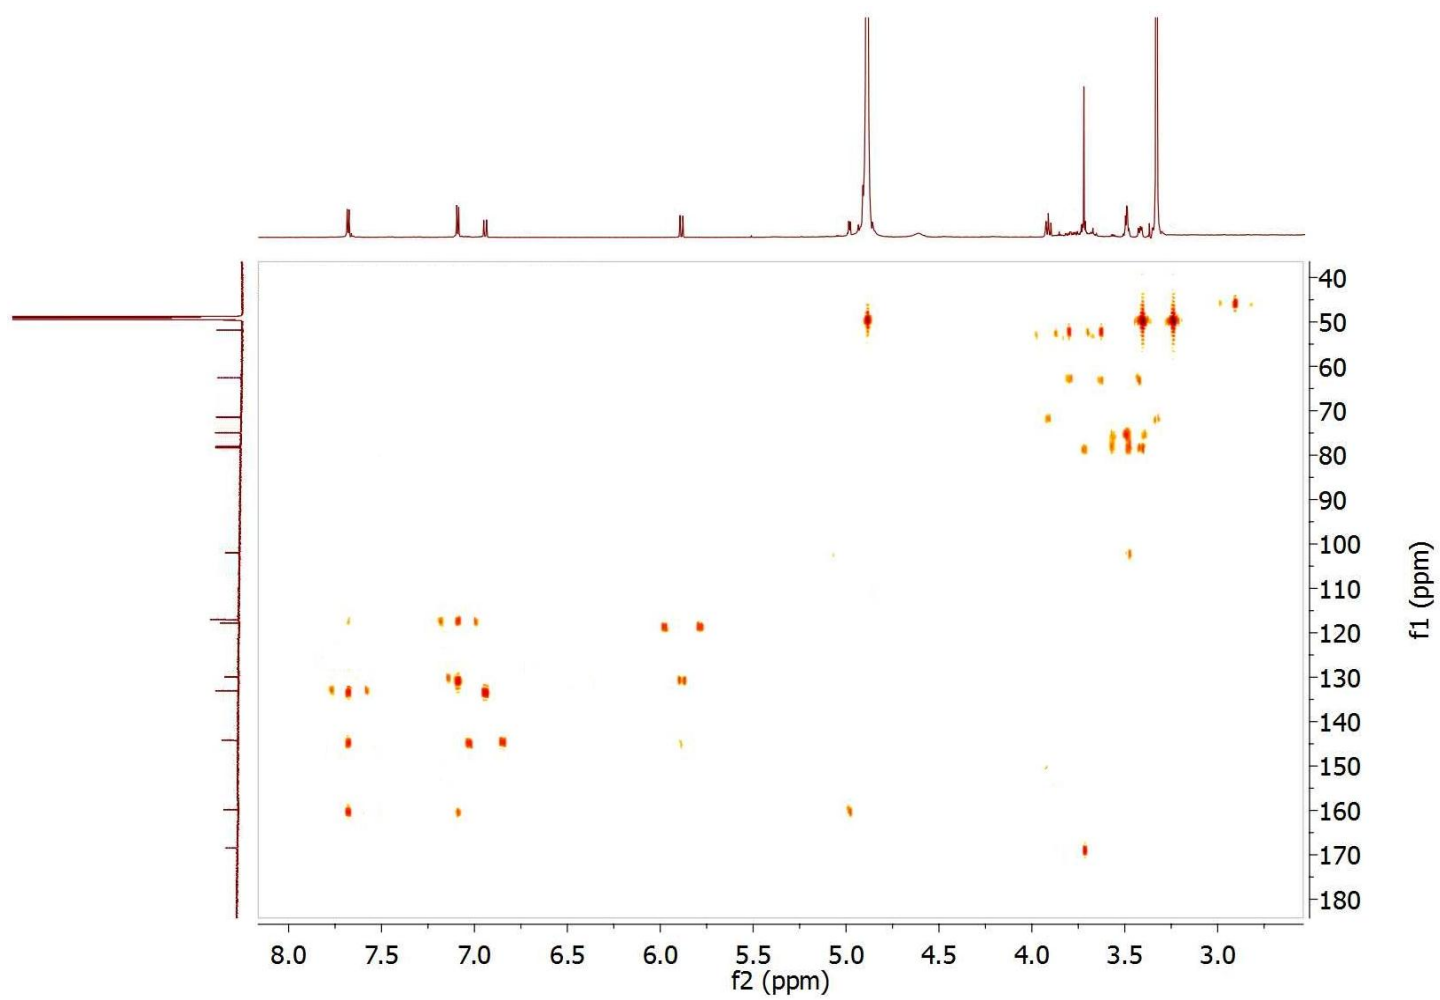

**Figure S9.** (+)-HRESIMS spectrum of compound **2**.

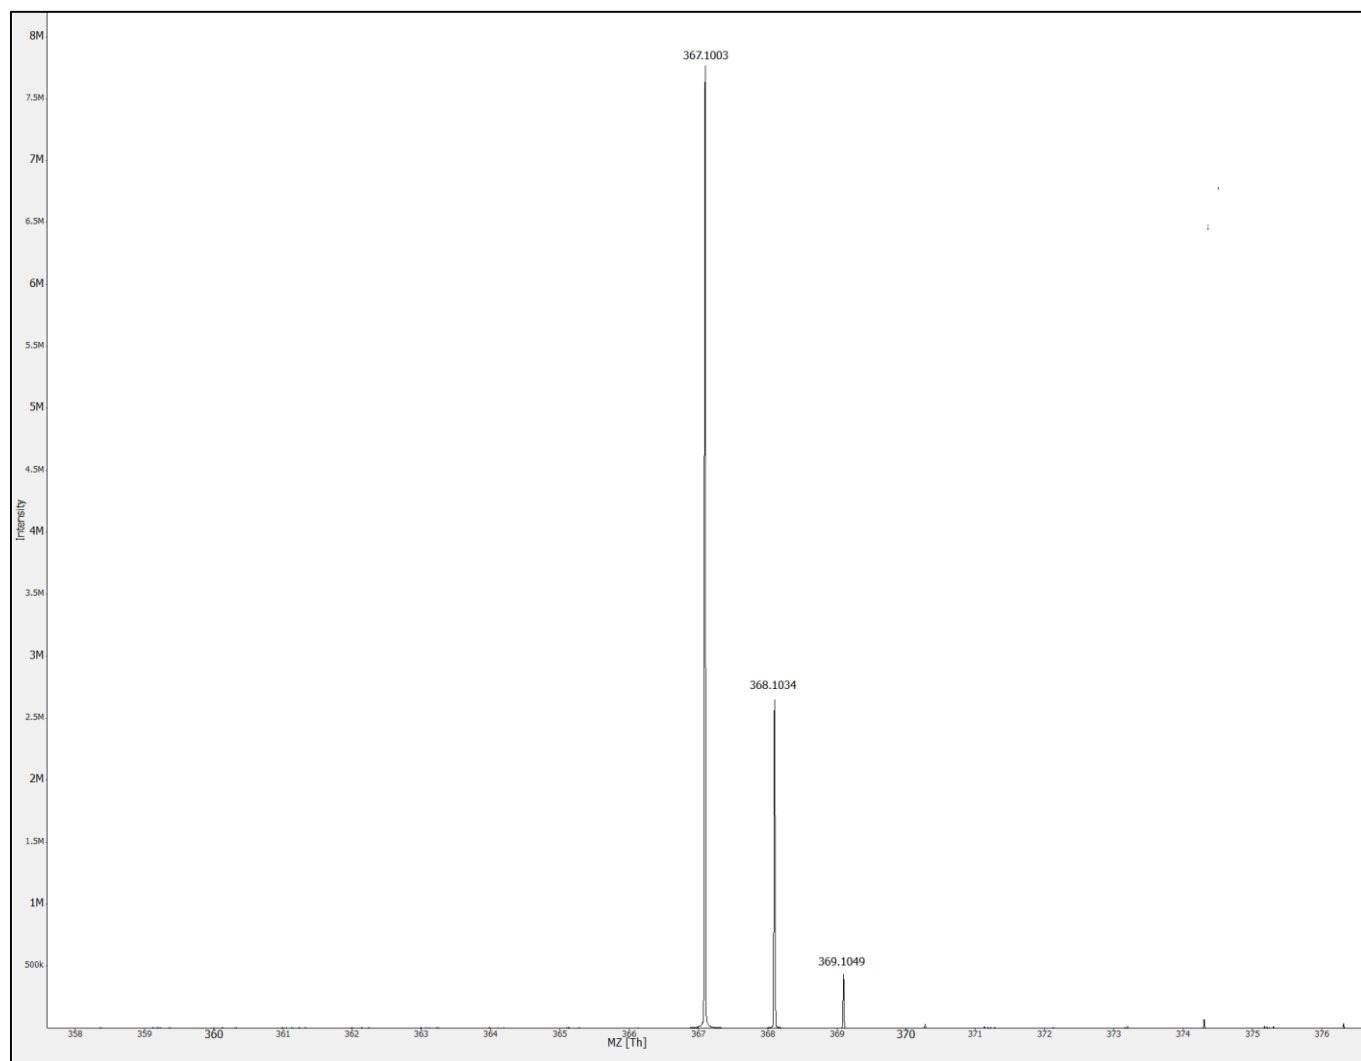

**Figure S10.**  $^1\text{H}$  NMR spectrum of compound **2** ( $\text{CD}_3\text{OD}$ ).

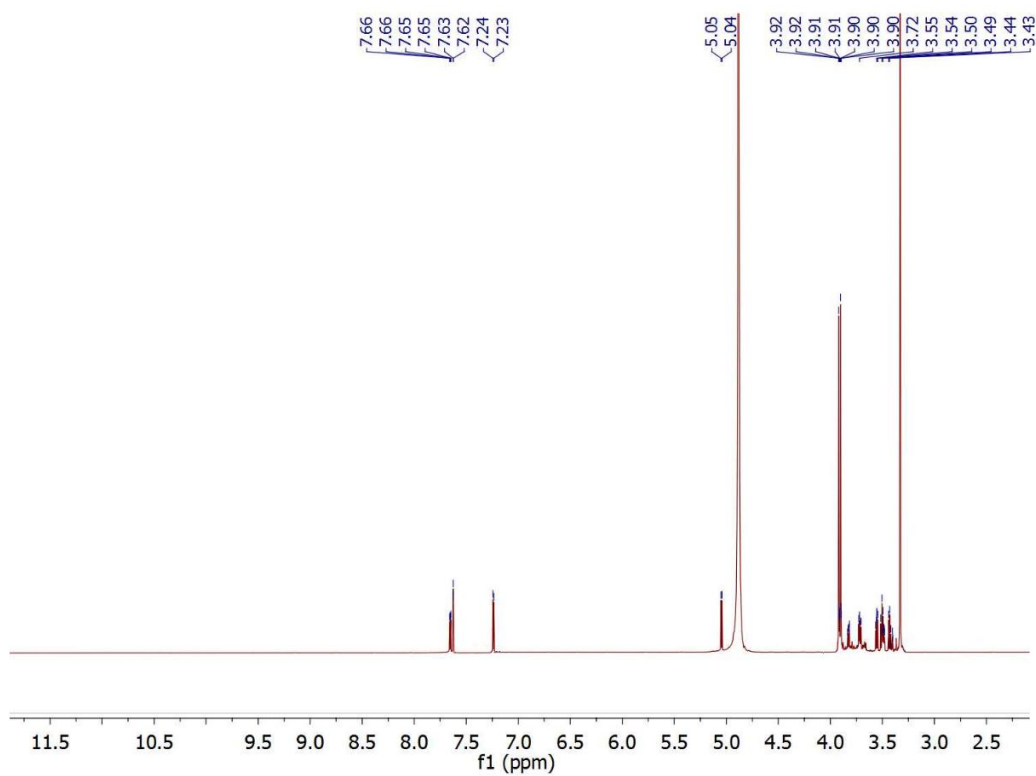

**Figure S11.** Expansion of  $^1\text{H}$  NMR spectrum of compound **2** ( $\text{CD}_3\text{OD}$ ).

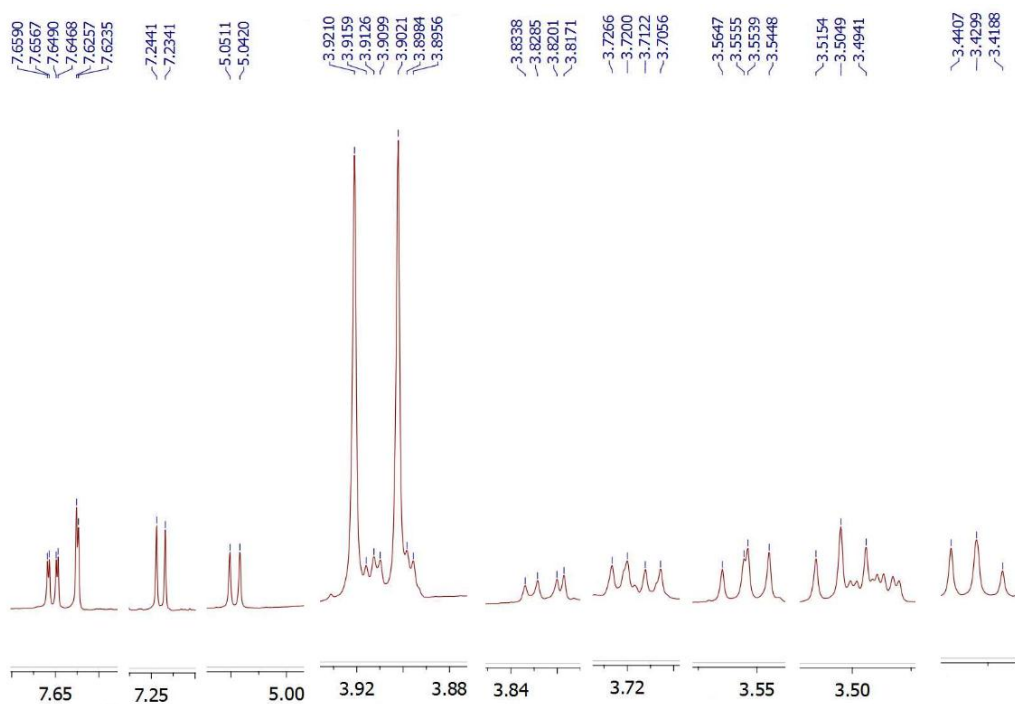



**Figure S12.**  $^{13}\text{C}$  NMR spectrum of compound **2** ( $\text{CD}_3\text{OD}$ ).

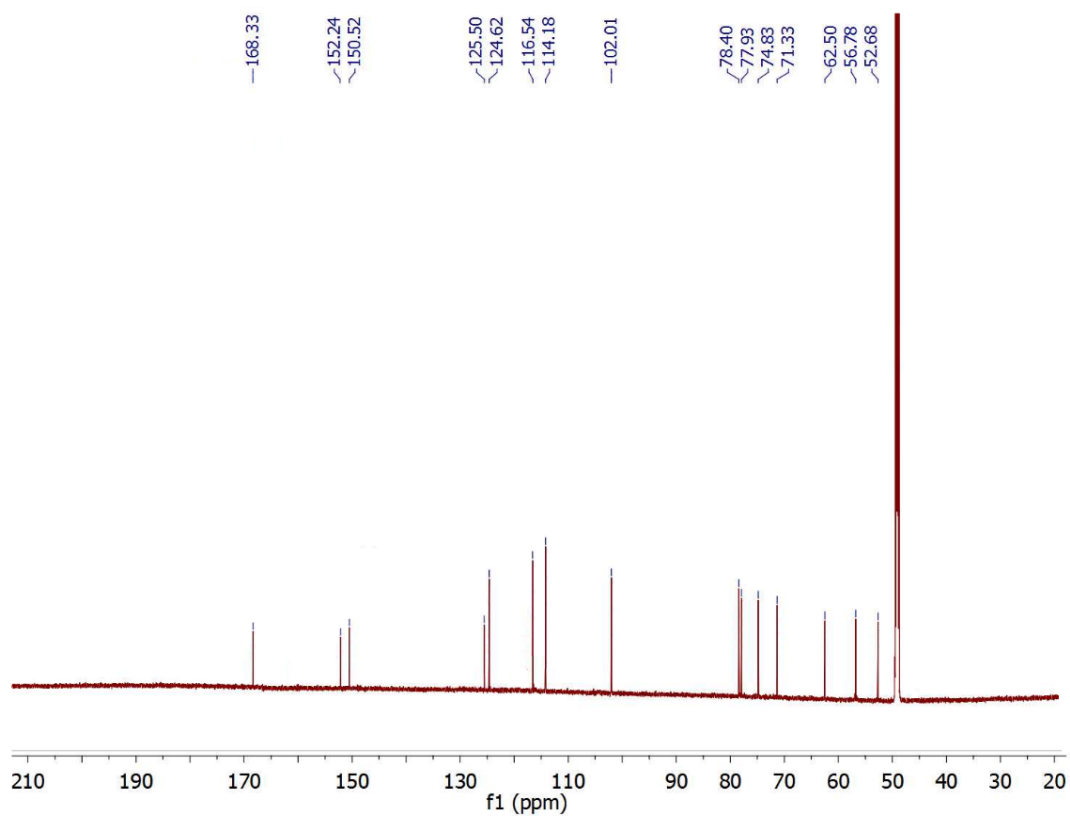

**Figure S13.** DEPT spectrum of compound **2** ( $\text{CD}_3\text{OD}$ ).

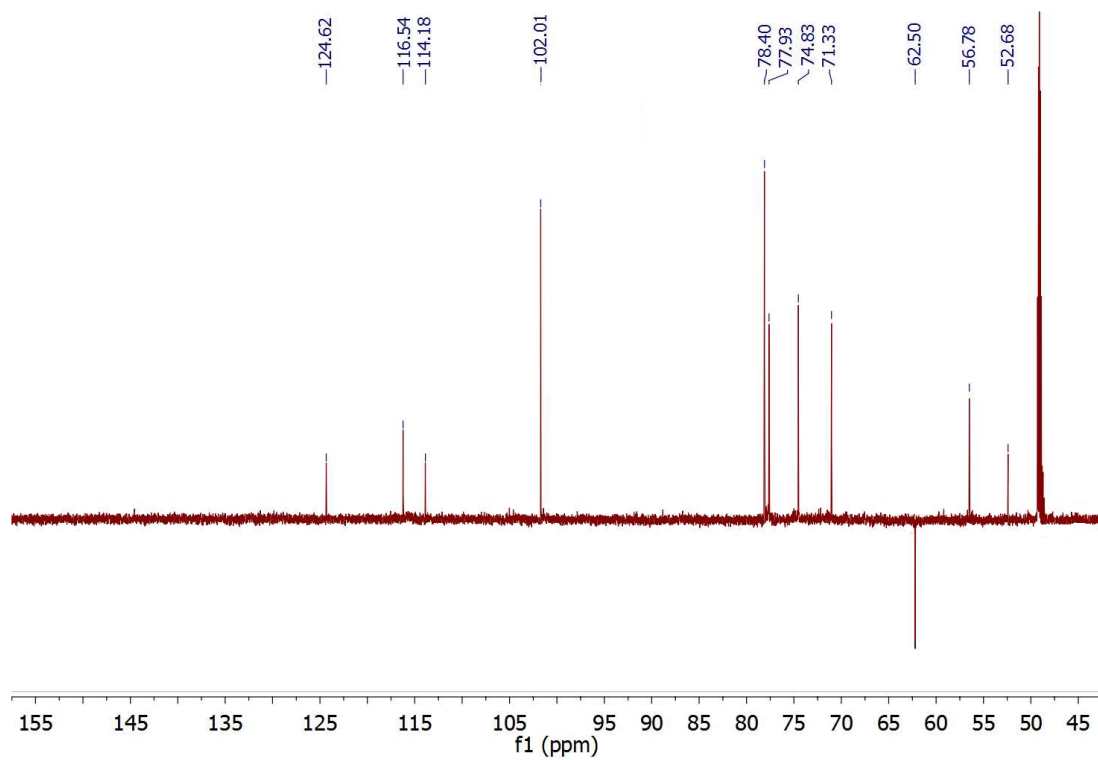

**Figure S14.** COSY spectrum of compound **2** (CD<sub>3</sub>OD).

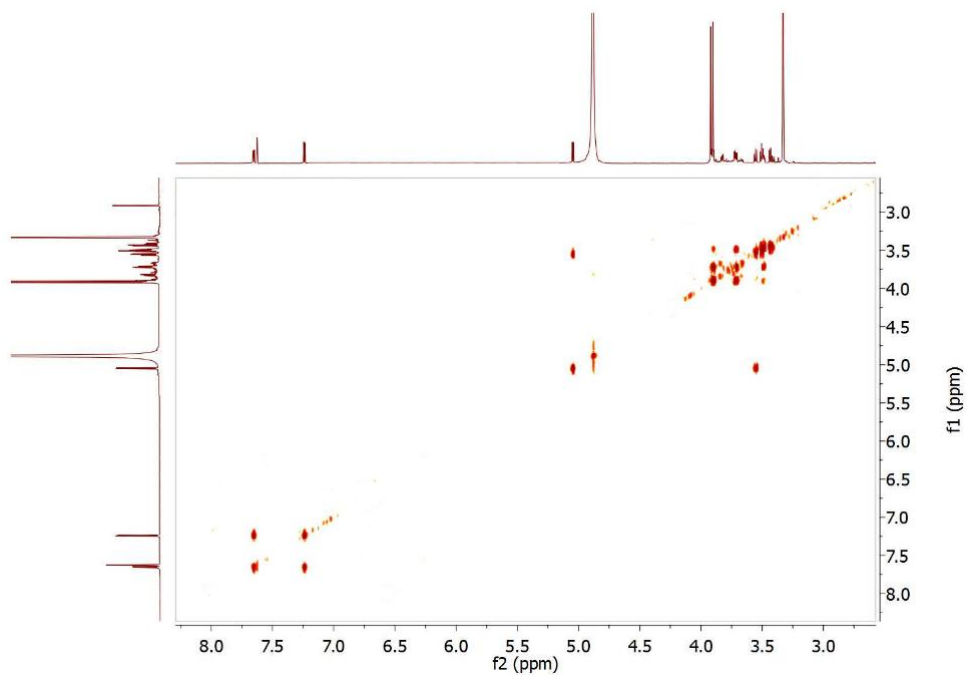

**Figure S15.** Multiplicity-edited HSQC spectrum of compound **2** (CD<sub>3</sub>OD).

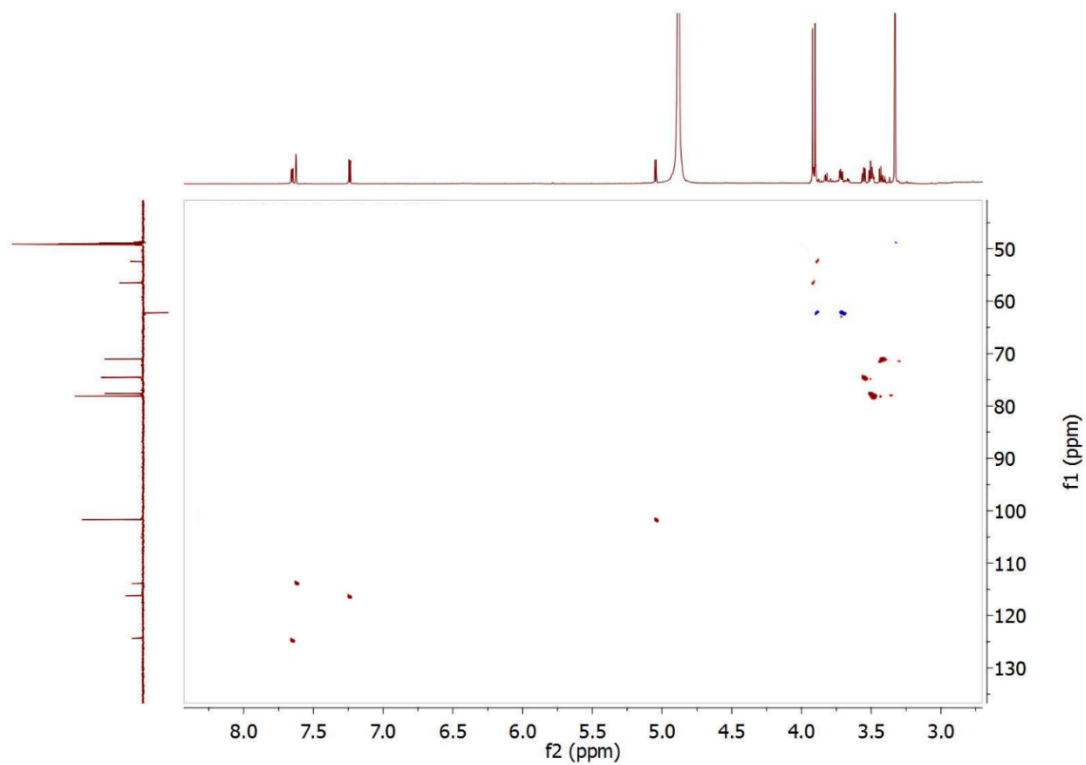

**Figure S16.**  $^1\text{H}$ - $^{13}\text{C}$  HMBC spectrum of compound **2** ( $\text{CD}_3\text{OD}$ ).

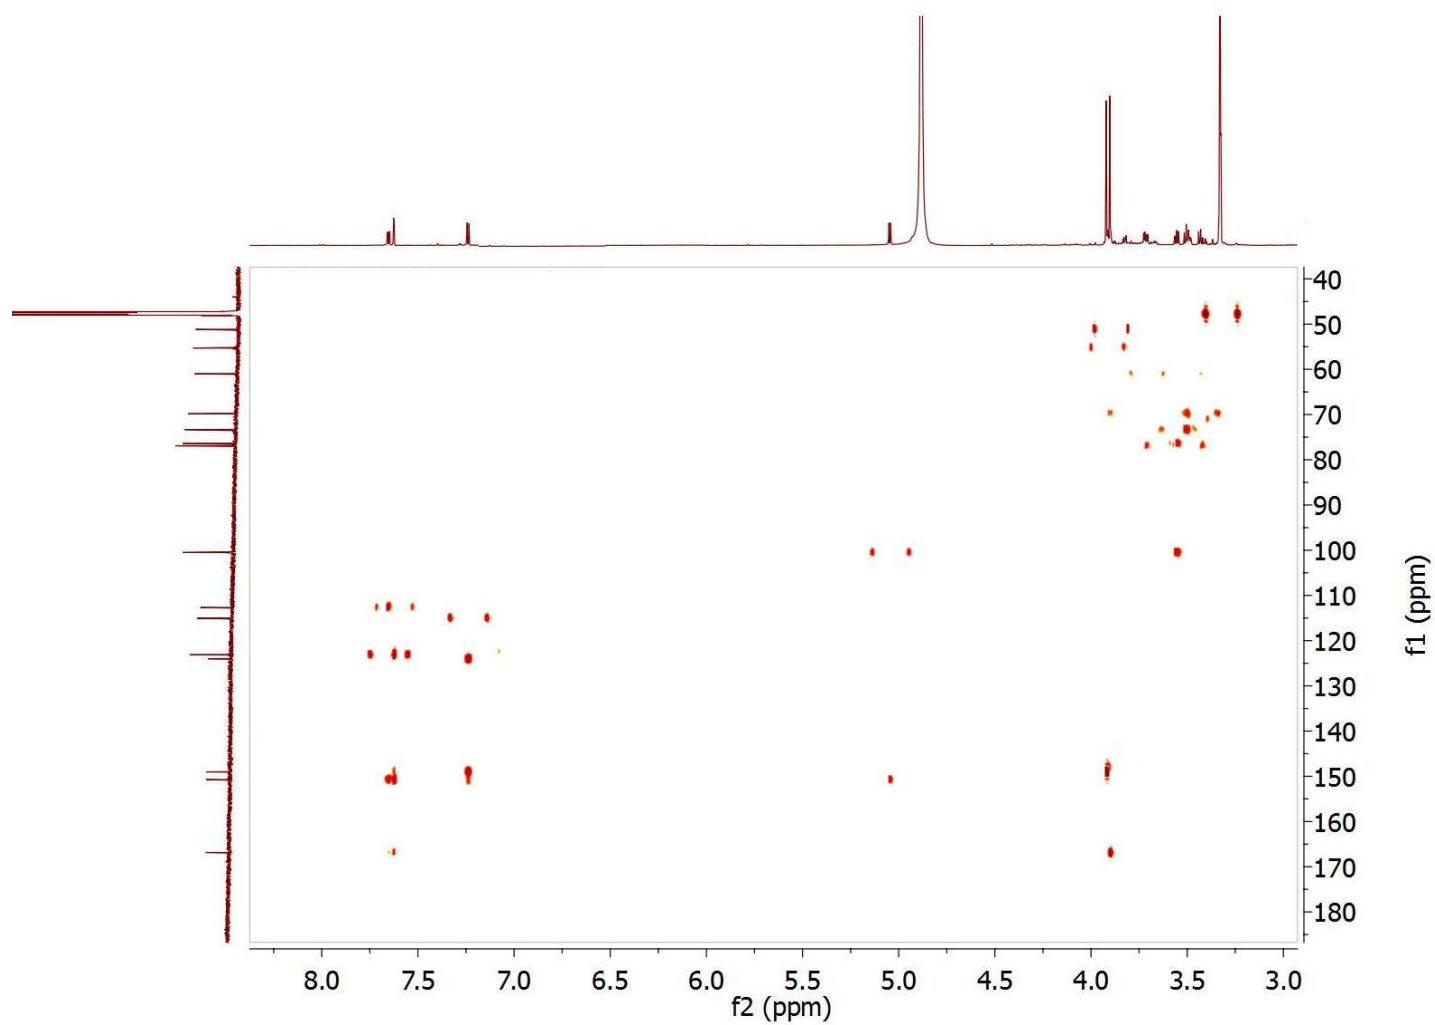

**Figure S17.** (+)-HRESIMS spectrum of compound **3**.

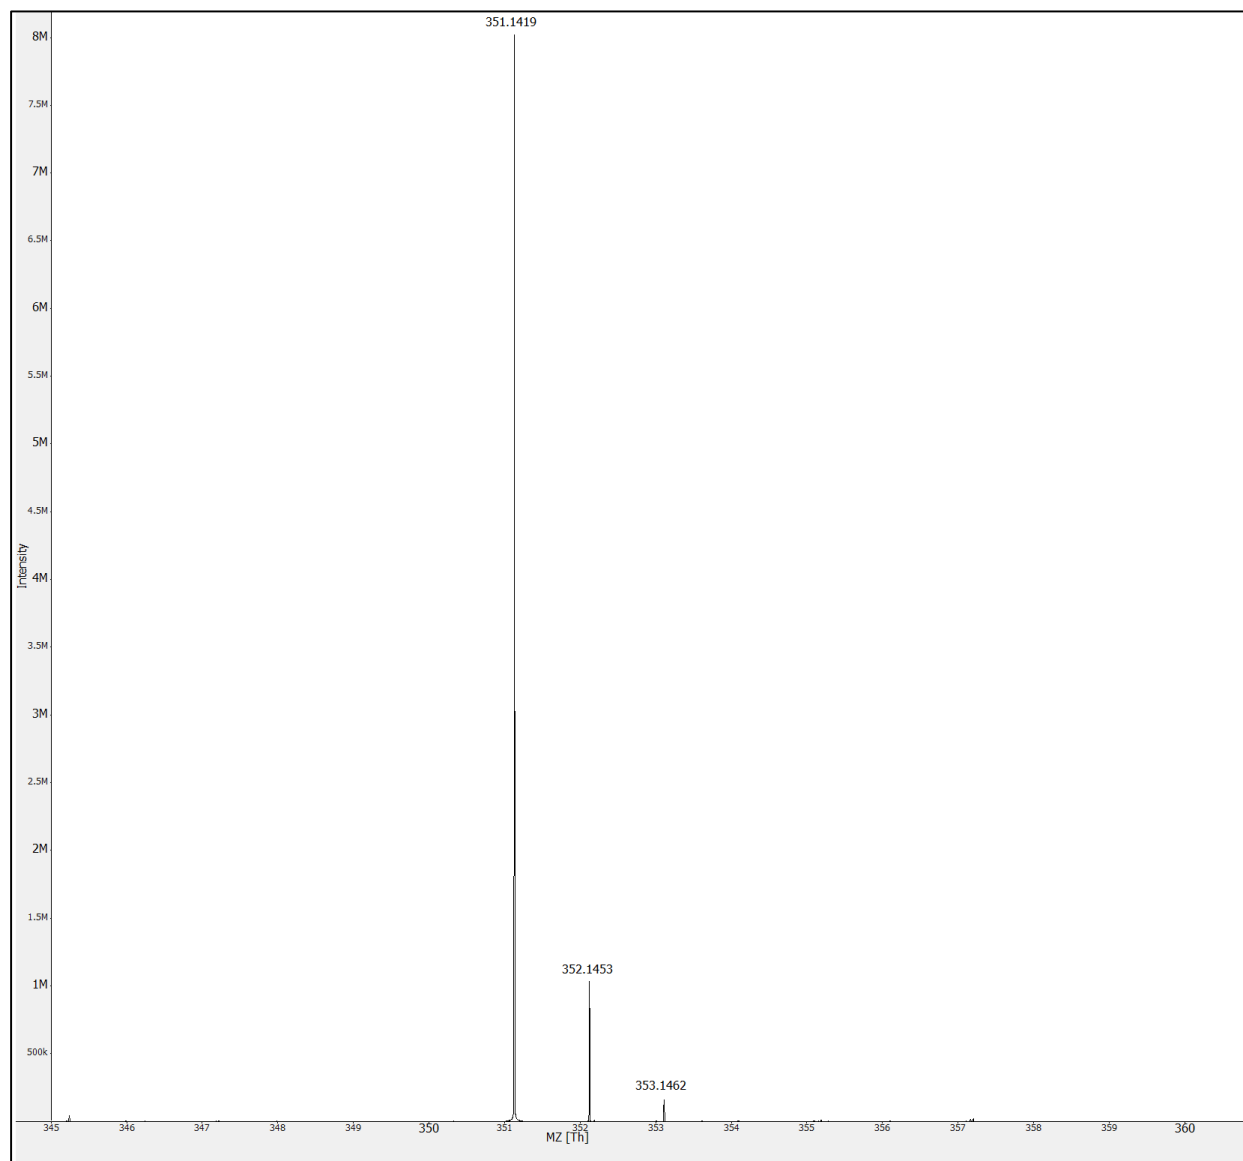

**Figure S18.**  $^1\text{H}$  NMR spectrum of compound **3** ( $\text{CD}_3\text{OD}$ ).

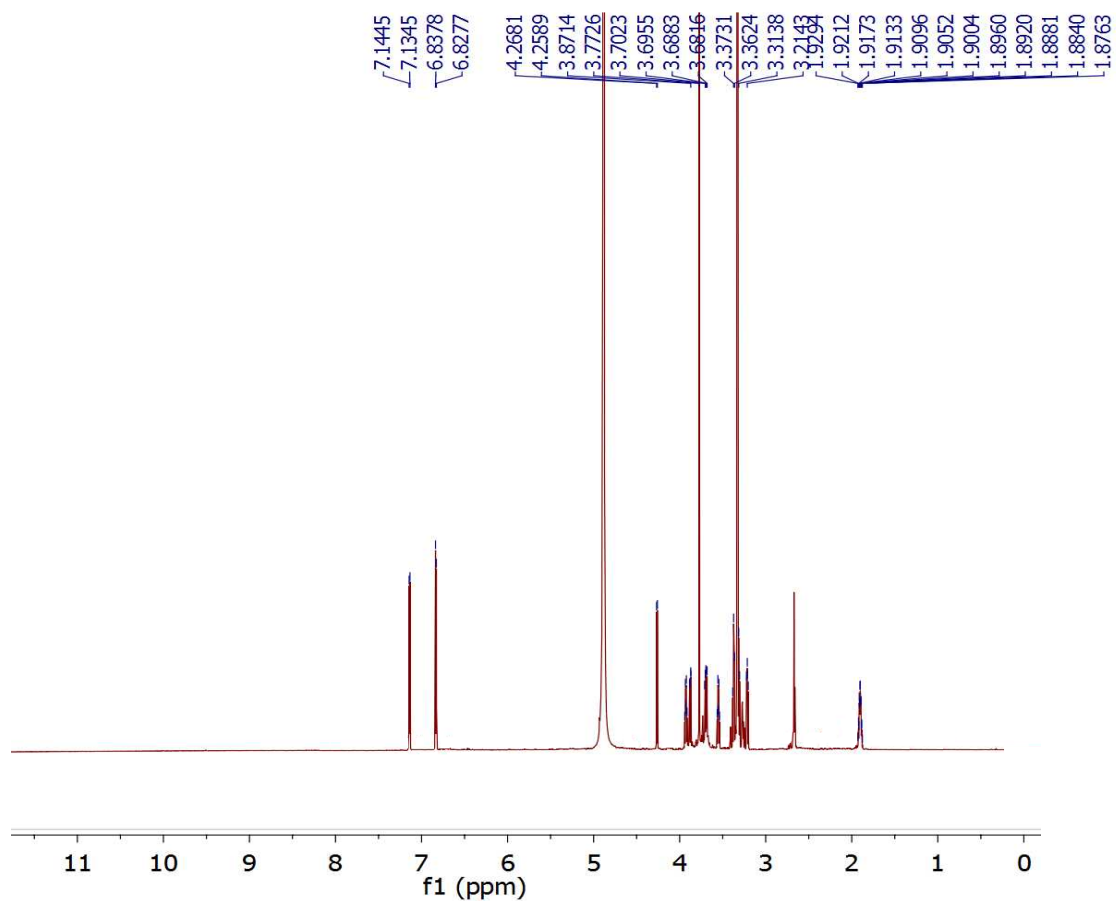

**Figure S19.** Expansion of  $^1\text{H}$  NMR spectrum of compound **3** ( $\text{CD}_3\text{OD}$ ).

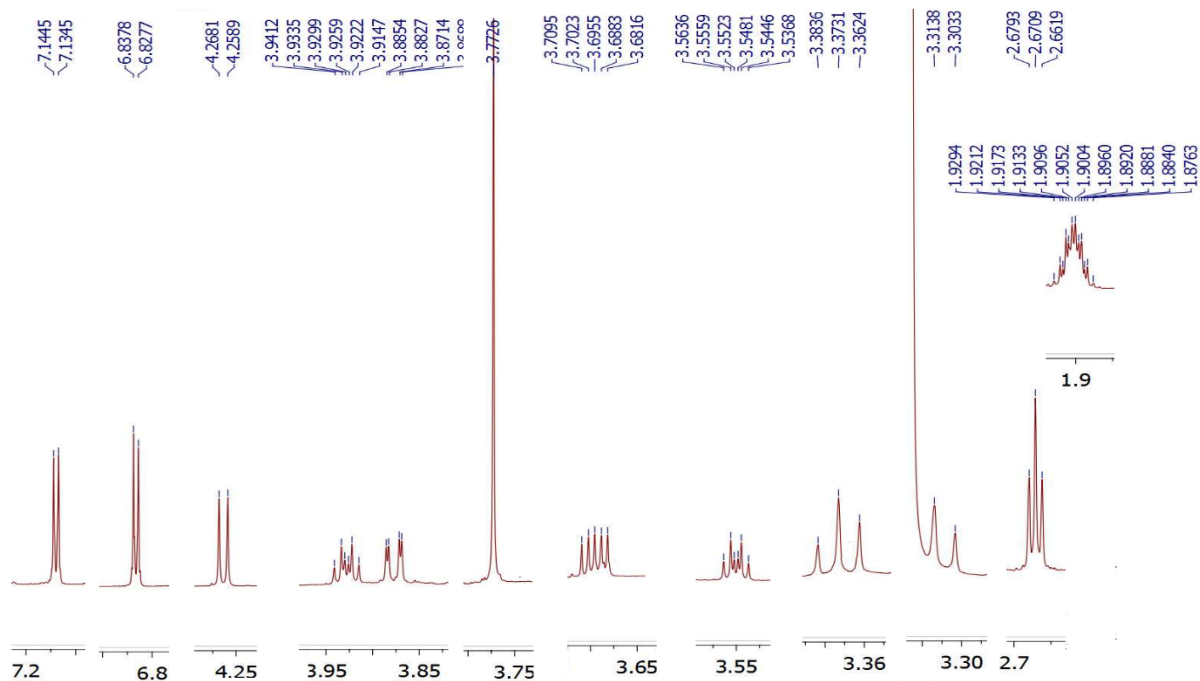

**Figure S20.**  $^{13}\text{C}$  NMR spectrum of compound **3** ( $\text{CD}_3\text{OD}$ ).

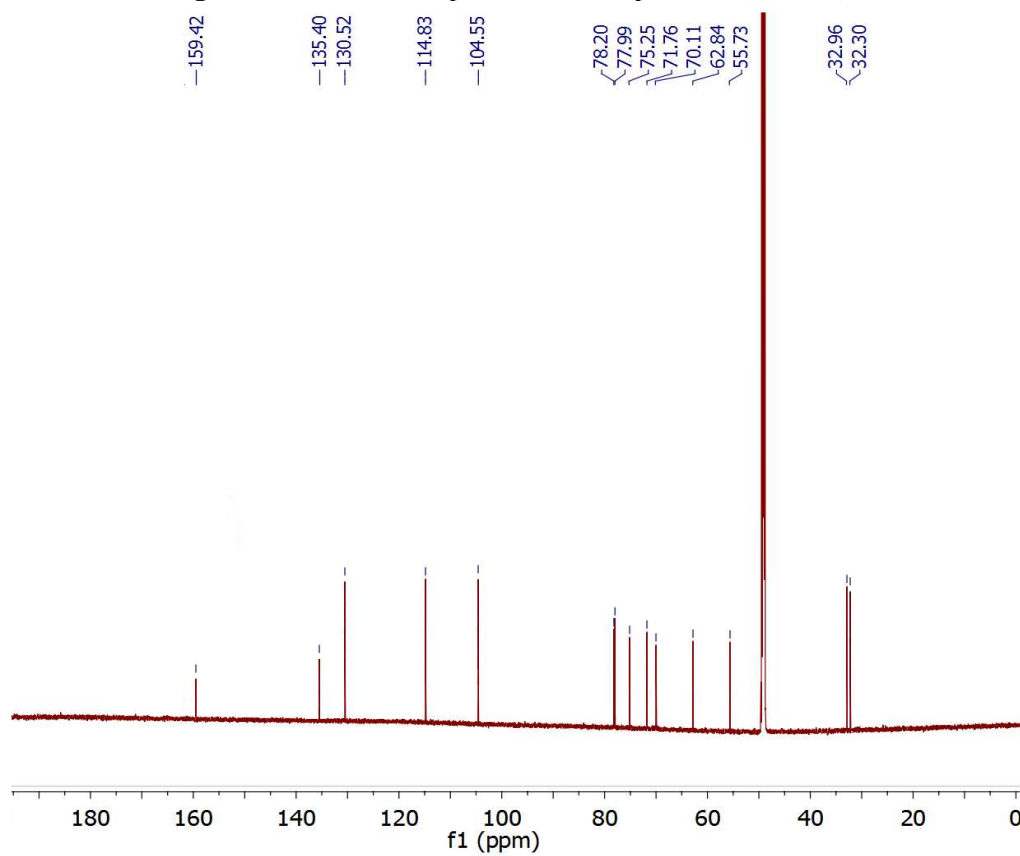

**Figure S21.** DEPT spectrum of compound **3** ( $\text{CD}_3\text{OD}$ ).

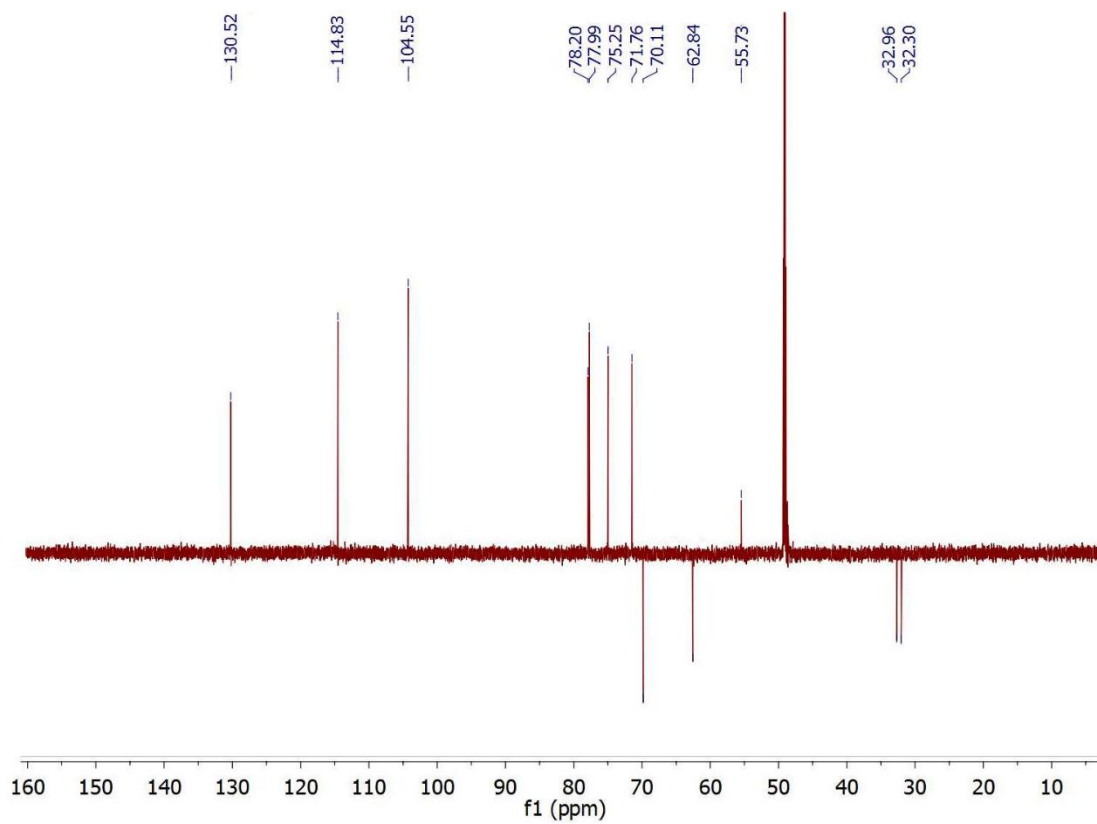

**Figure S22.** COSY spectrum of compound **3** (CD<sub>3</sub>OD).

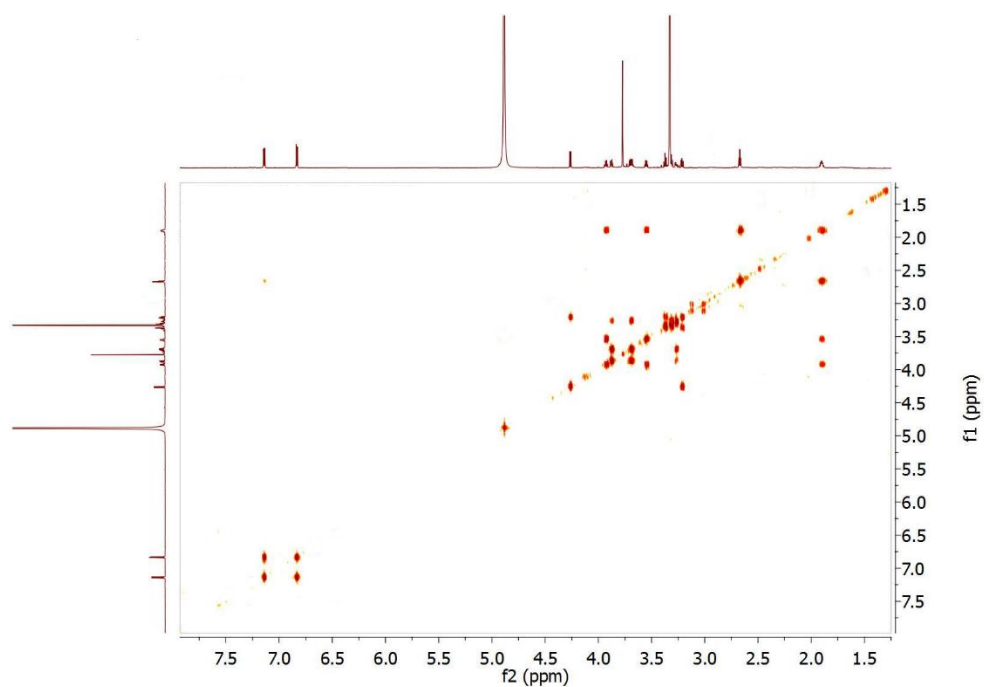

**Figure S23.** Multiplicity-edited HSQC spectrum of compound **3** (CD<sub>3</sub>OD).

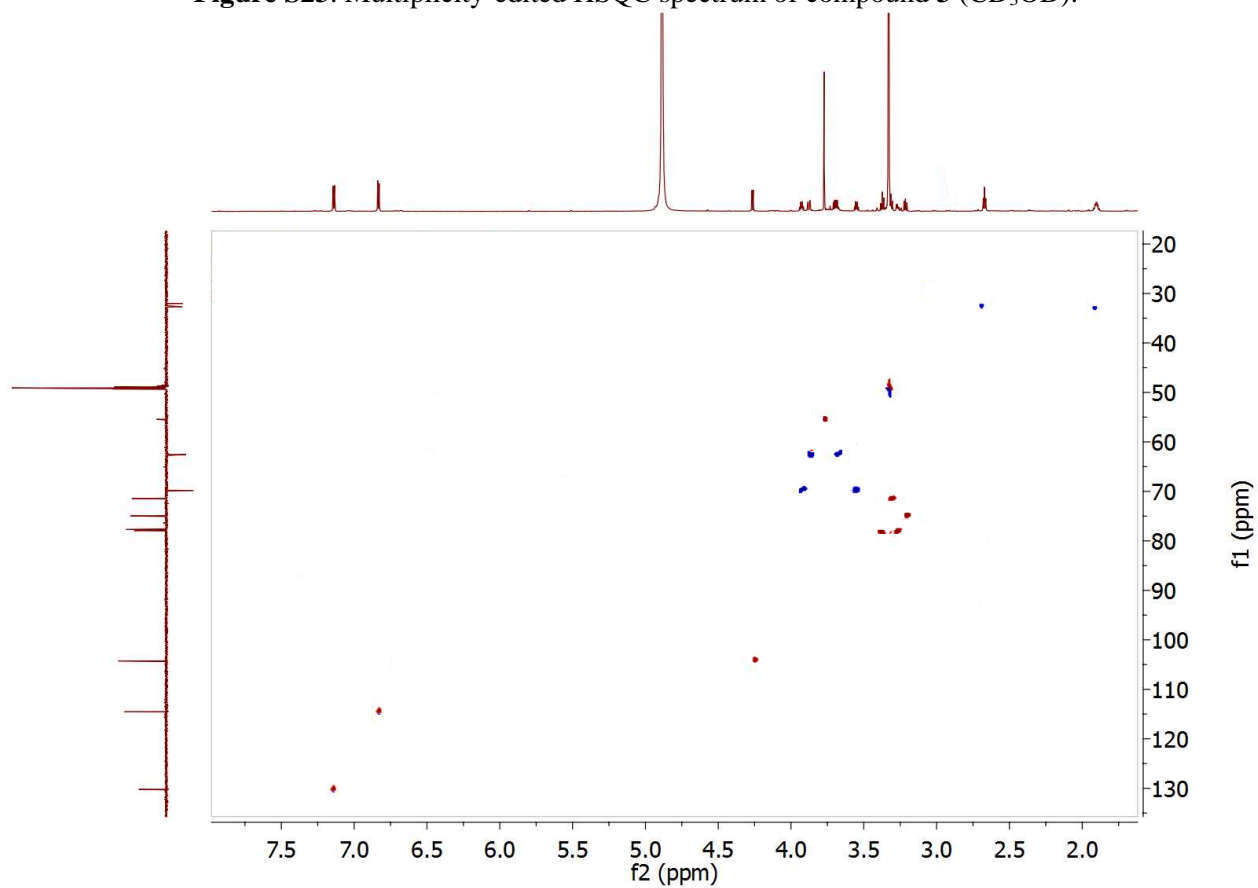

**Figure S24.**  $^1\text{H}$ - $^{13}\text{C}$  HMBC spectrum of compound **3** ( $\text{CD}_3\text{OD}$ ).

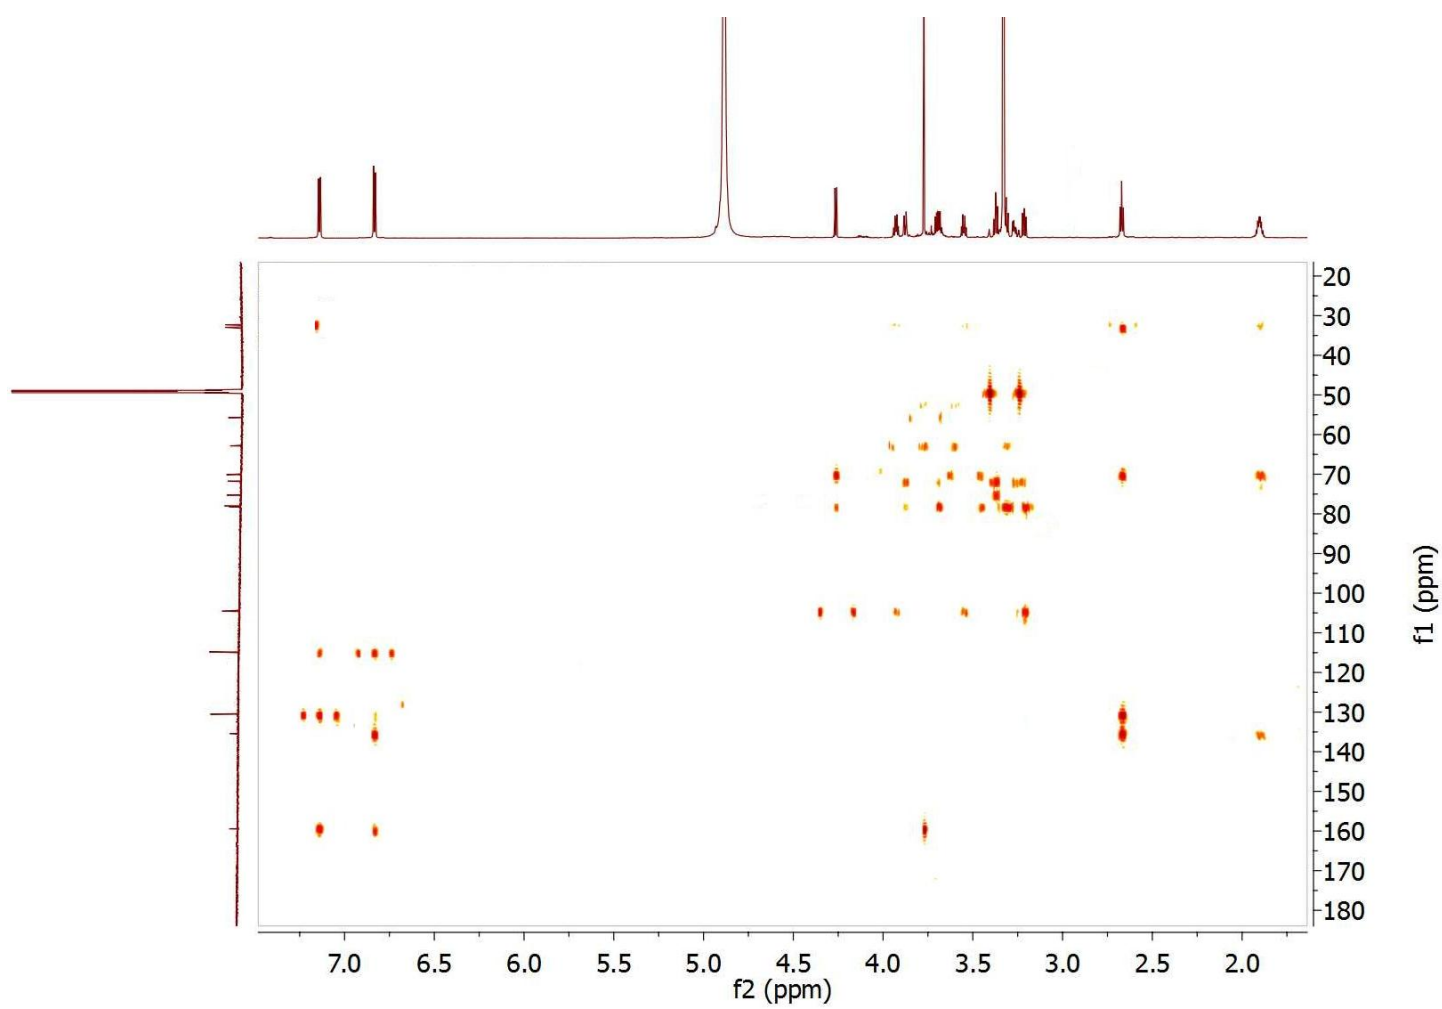



**Figure S25.** (+)-HRESIMS spectrum of compound **4**.

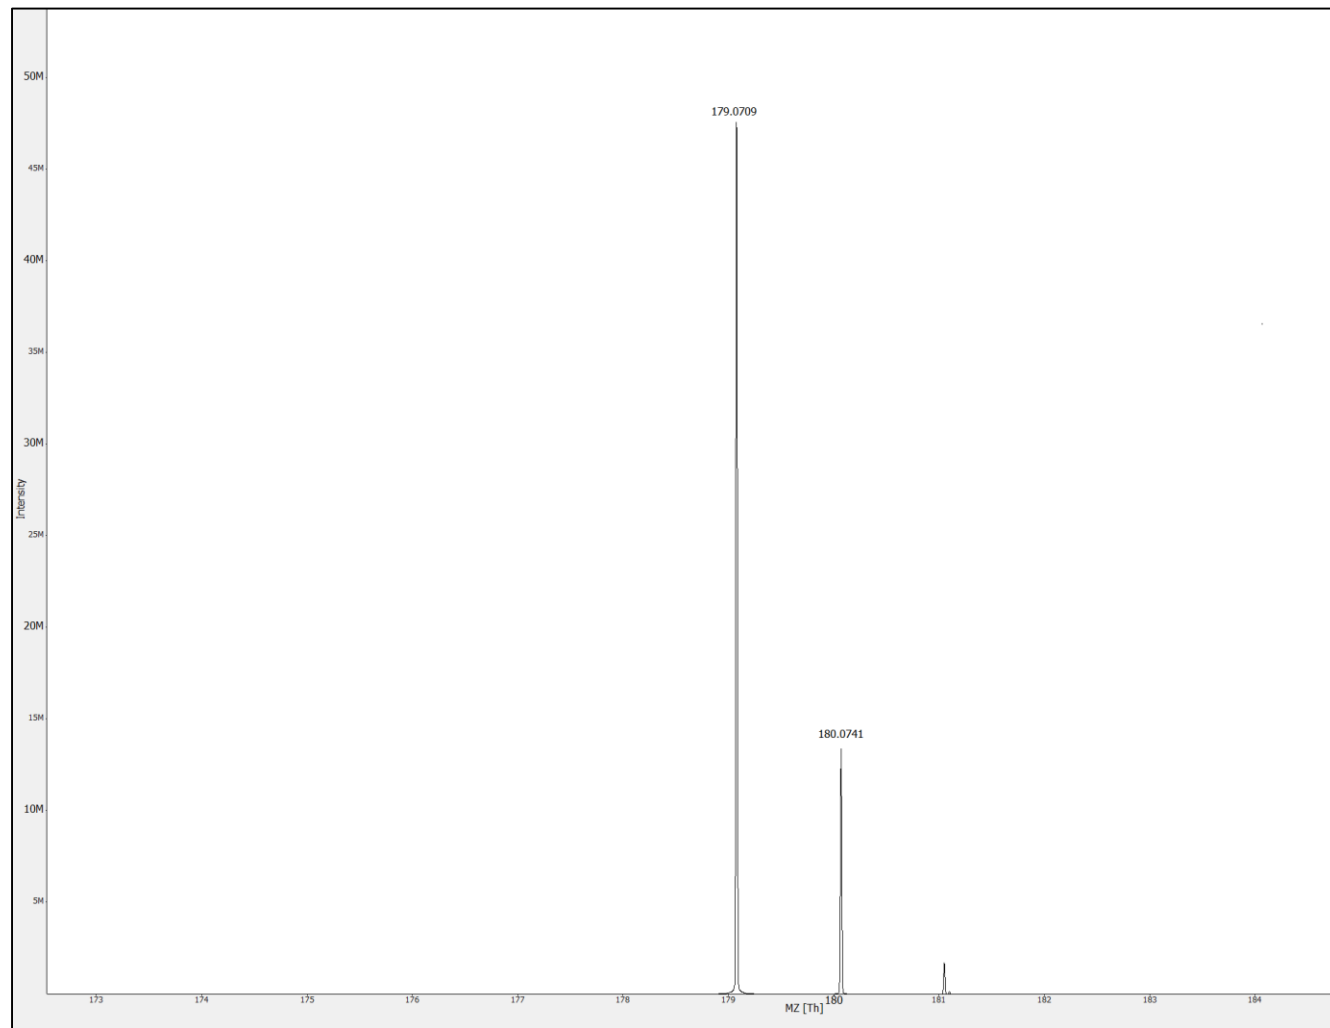

**Figure S26.**  $^1\text{H}$  NMR spectrum of compound **4** ( $\text{CD}_3\text{OD}$ ).

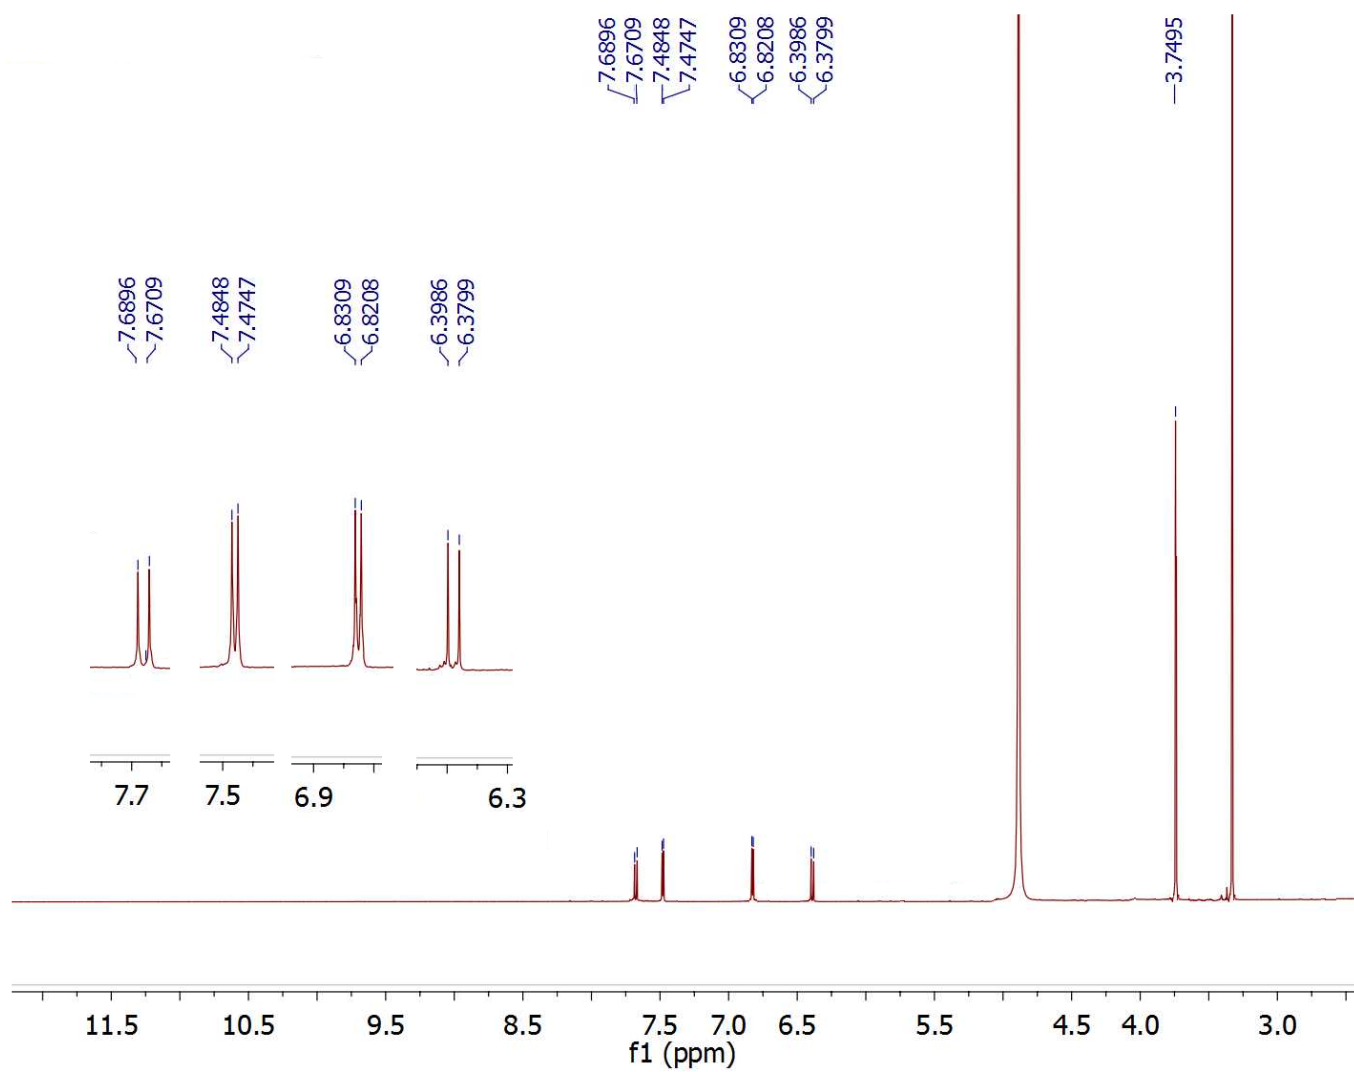

Figure S27.  $^{13}\text{C}$  NMR spectrum of compound **4** ( $\text{CD}_3\text{OD}$ ).

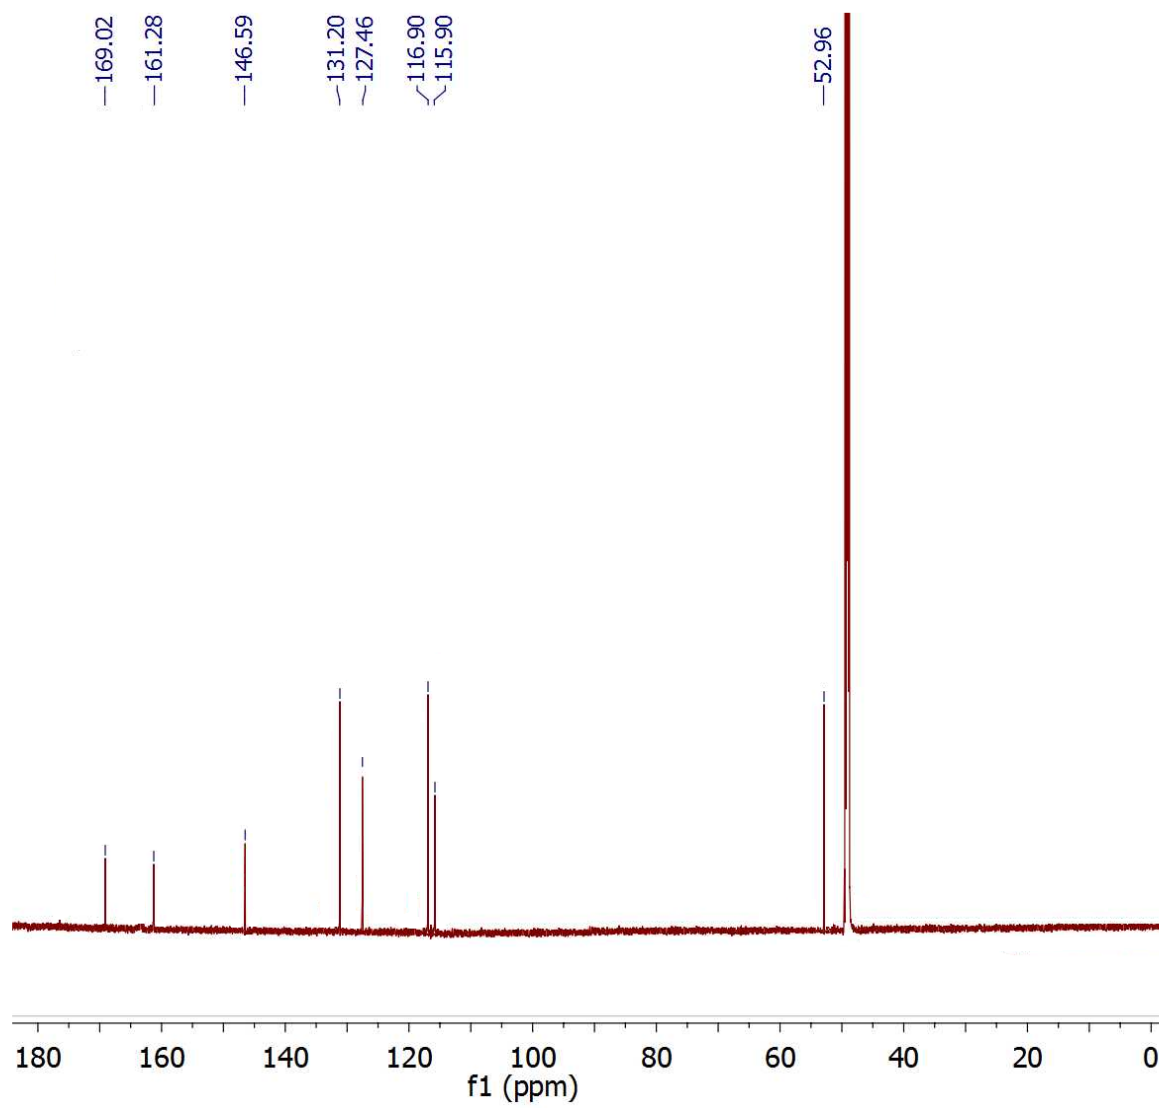

**Figure S28.** (+)-HRESIMS spectrum of compound **5**.

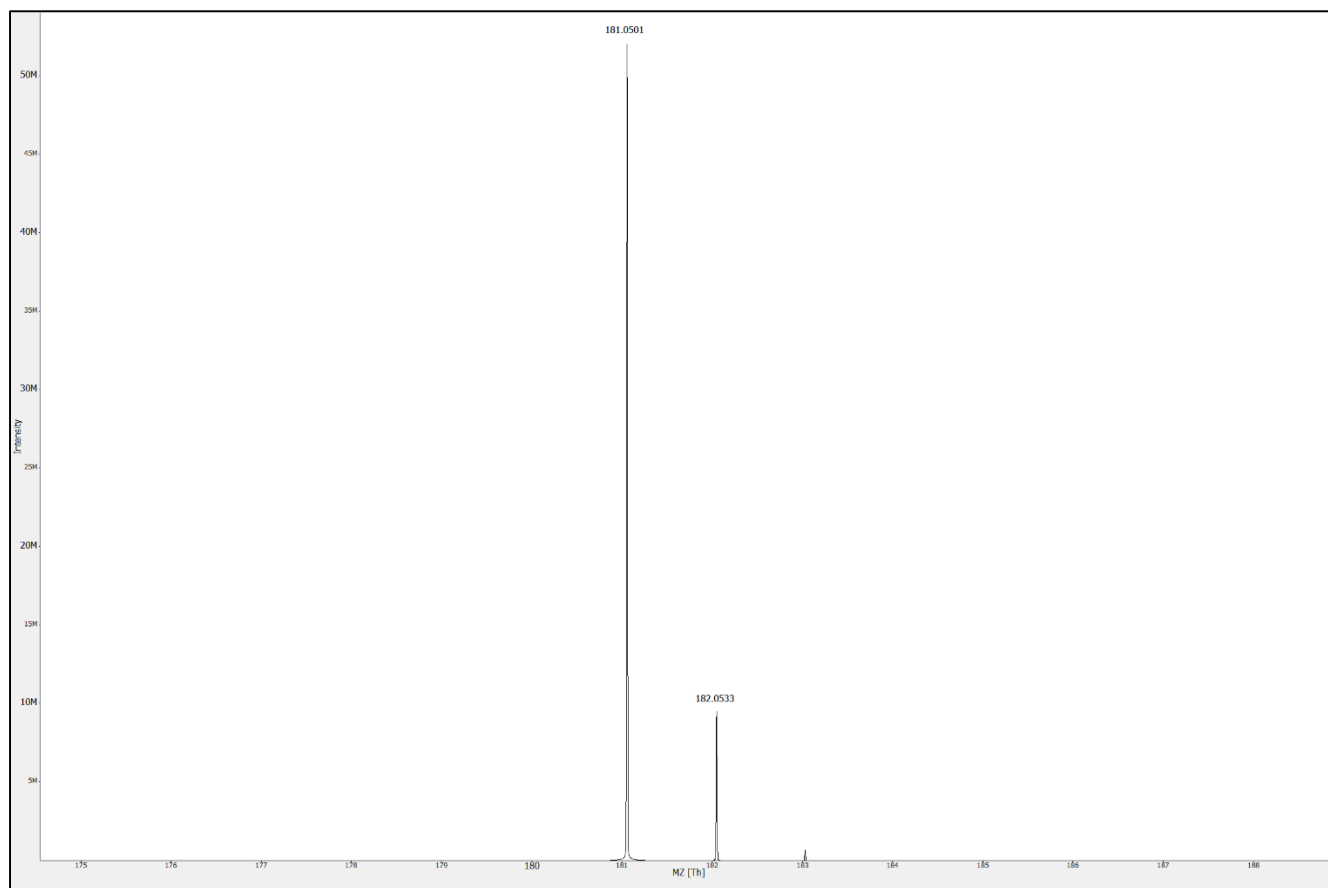

**Figure S29.**  $^1\text{H}$  NMR spectrum of compound **5** ( $\text{CD}_3\text{OD}$ ).

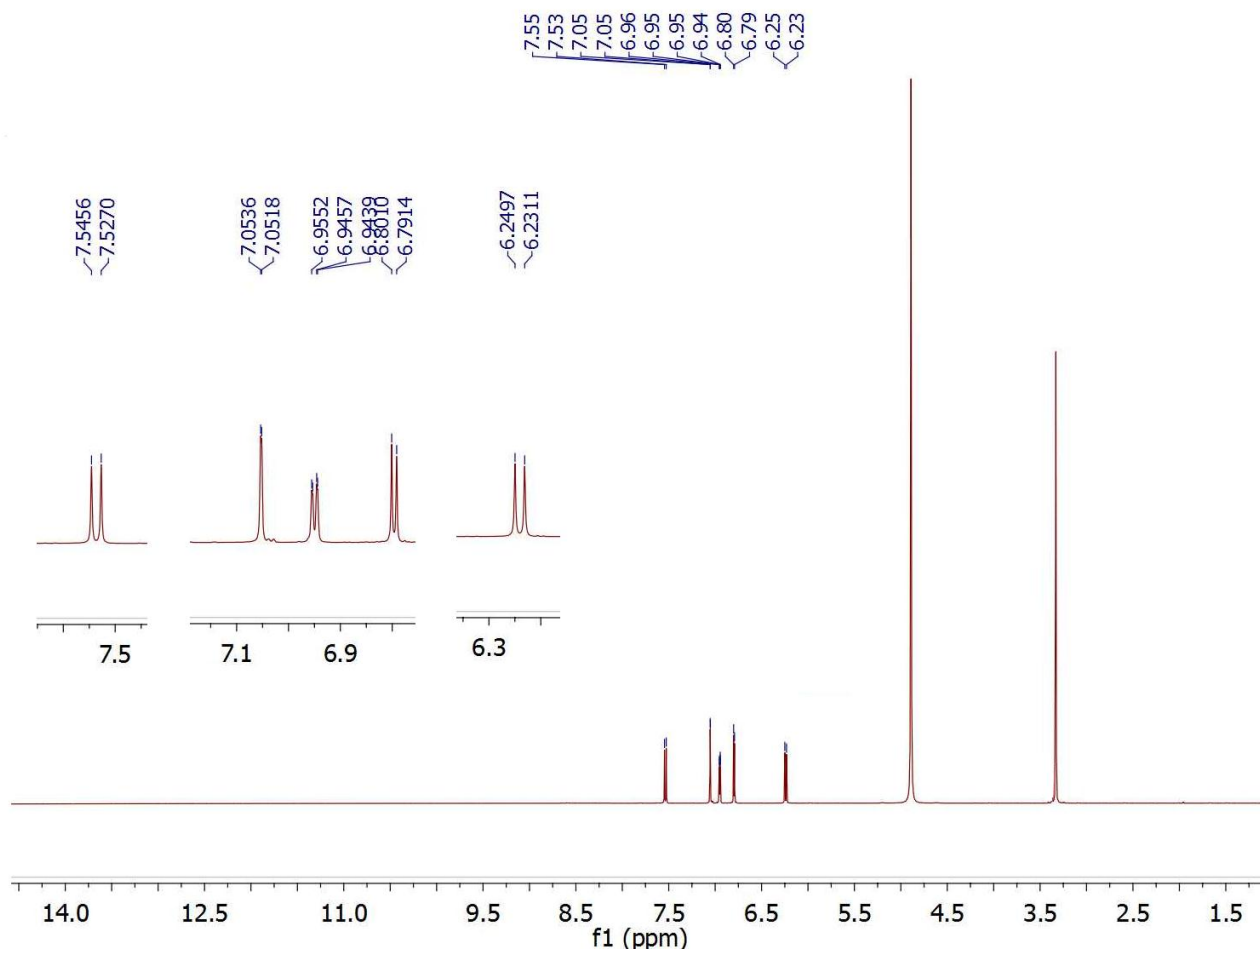

**Figure S30.**  $^{13}\text{C}$  NMR spectrum of compound **5** ( $\text{CD}_3\text{OD}$ ).

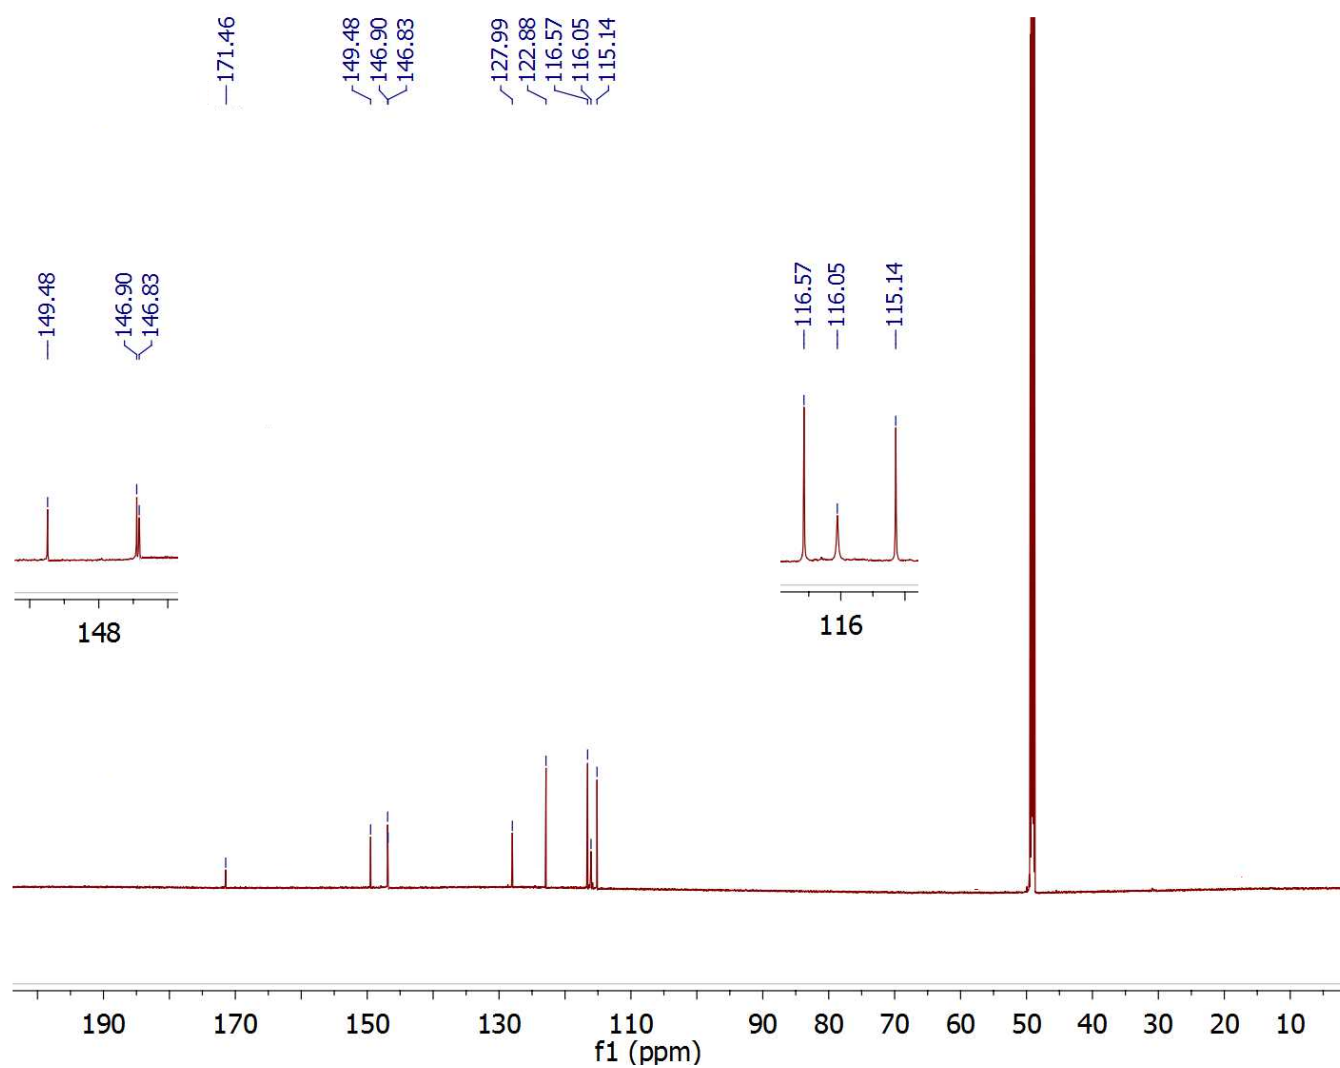

**Figure S31.** (+)-HRESIMS spectrum of compound **6**.

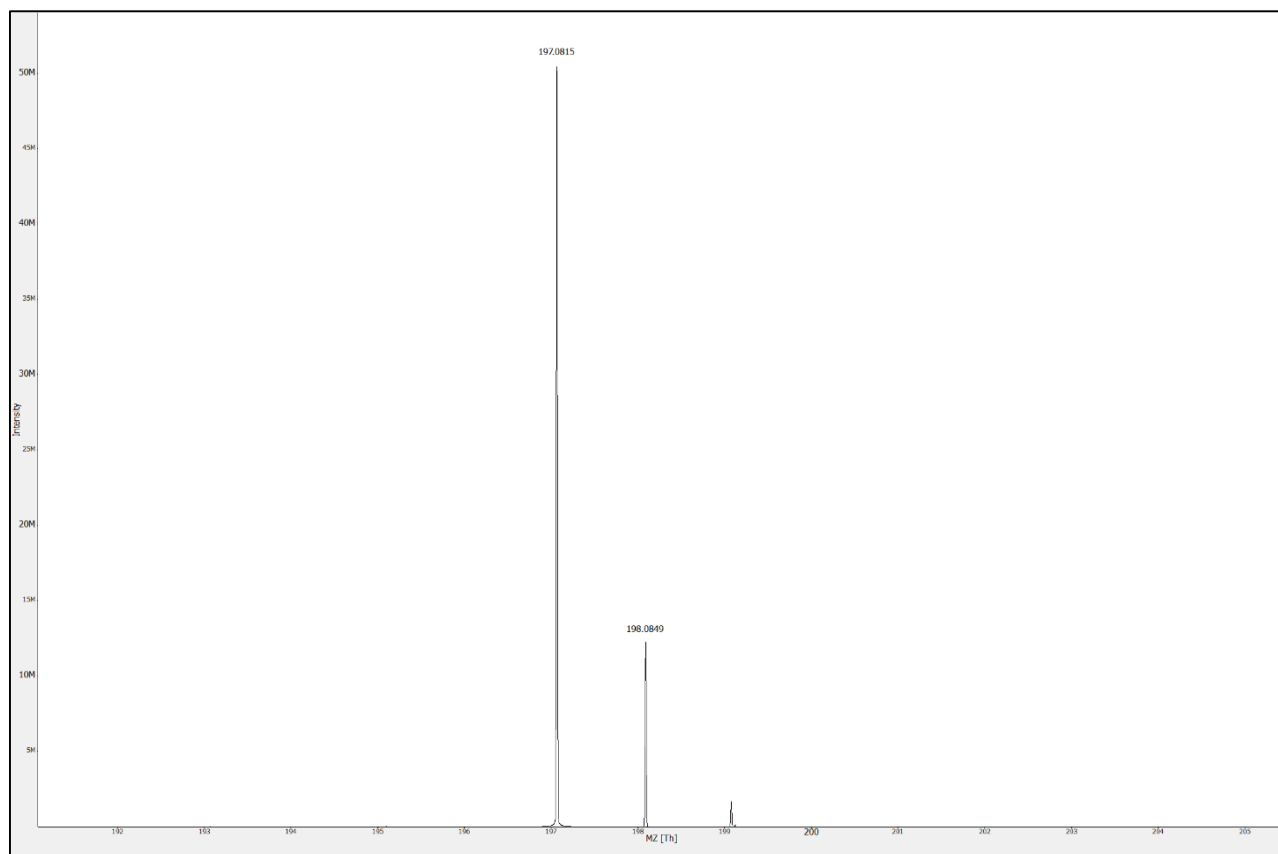

**Figure S32.**  $^1\text{H}$  NMR spectrum of compound **6** ( $\text{CD}_3\text{OD}$ ).

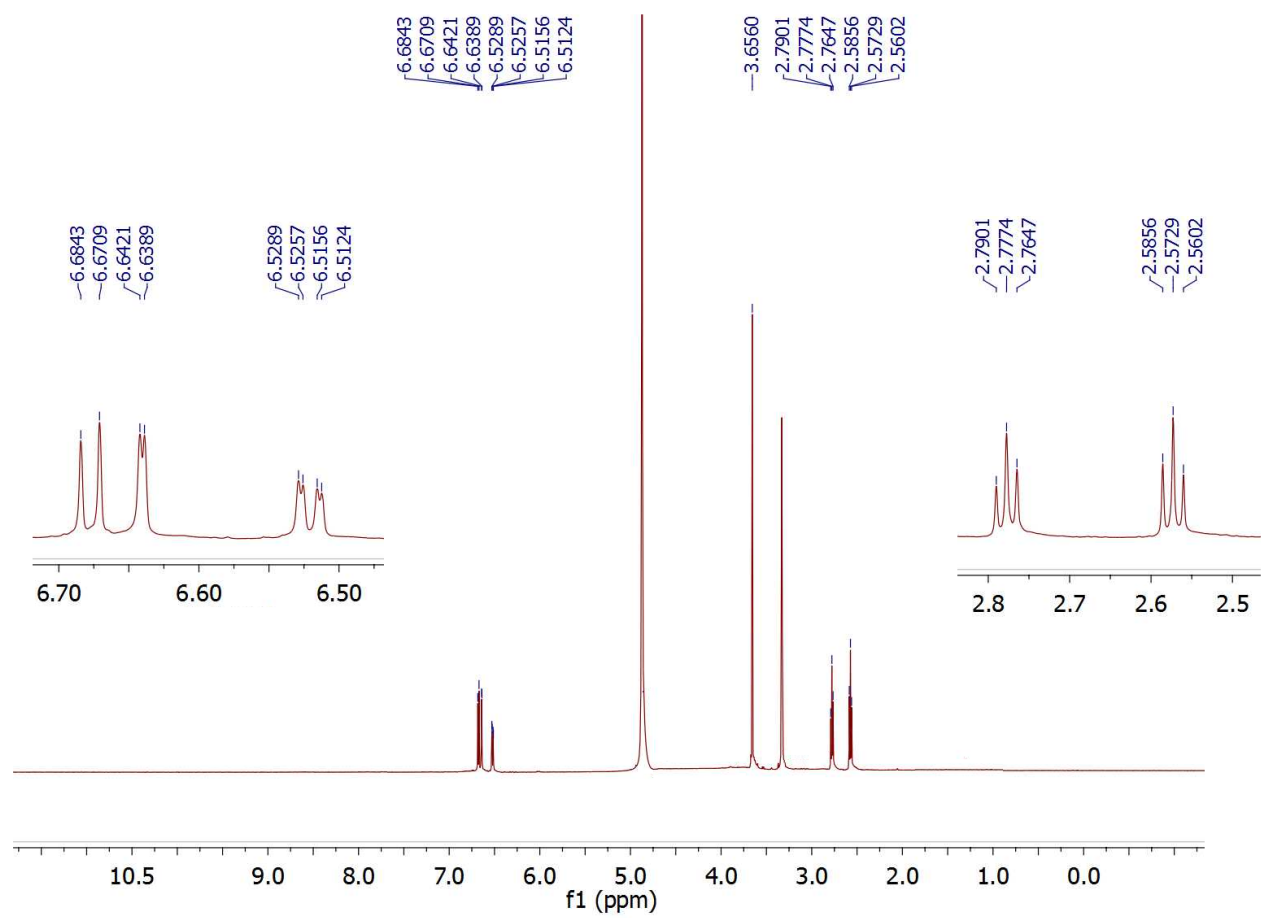



**Figure S33.**  $^{13}\text{C}$  NMR spectrum of compound **6** ( $\text{CD}_3\text{OD}$ ).

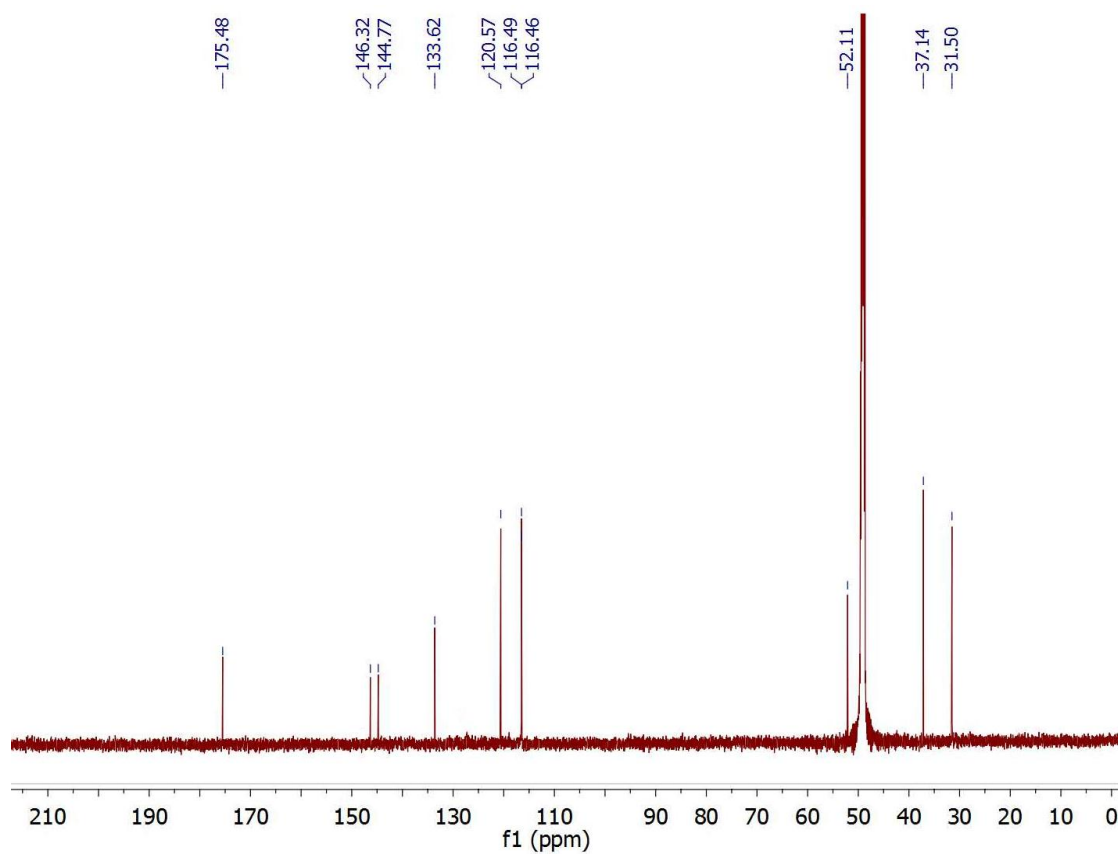

**Figure S34.** (+)-HRESIMS spectrum of compound **7**.

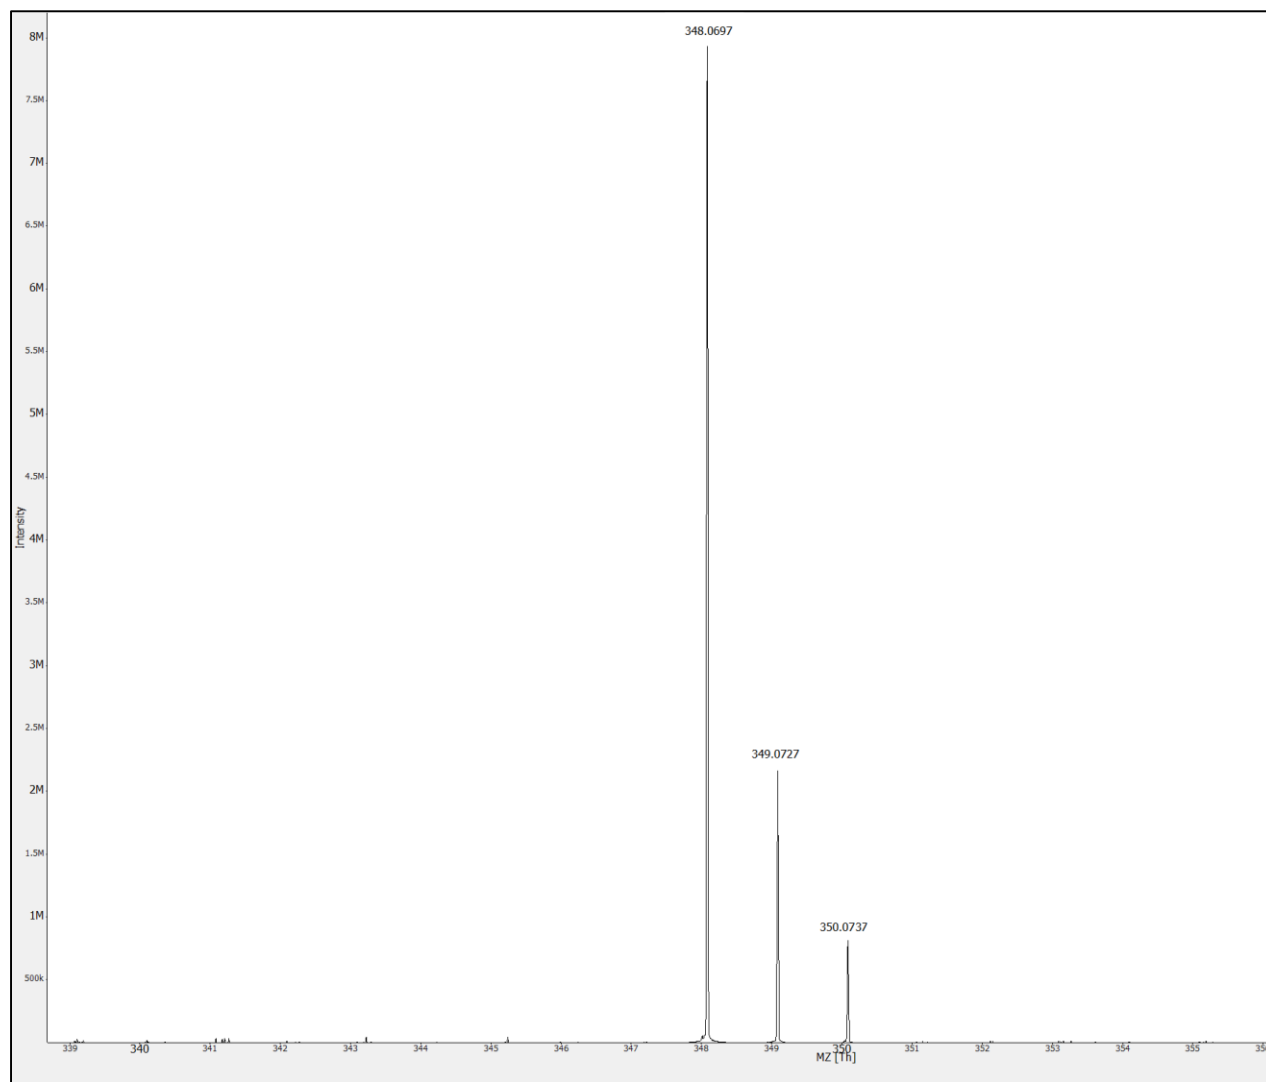

**Figure S35.**  $^1\text{H}$  NMR spectrum of compound **7**·(DMSO- $d_6$ ).

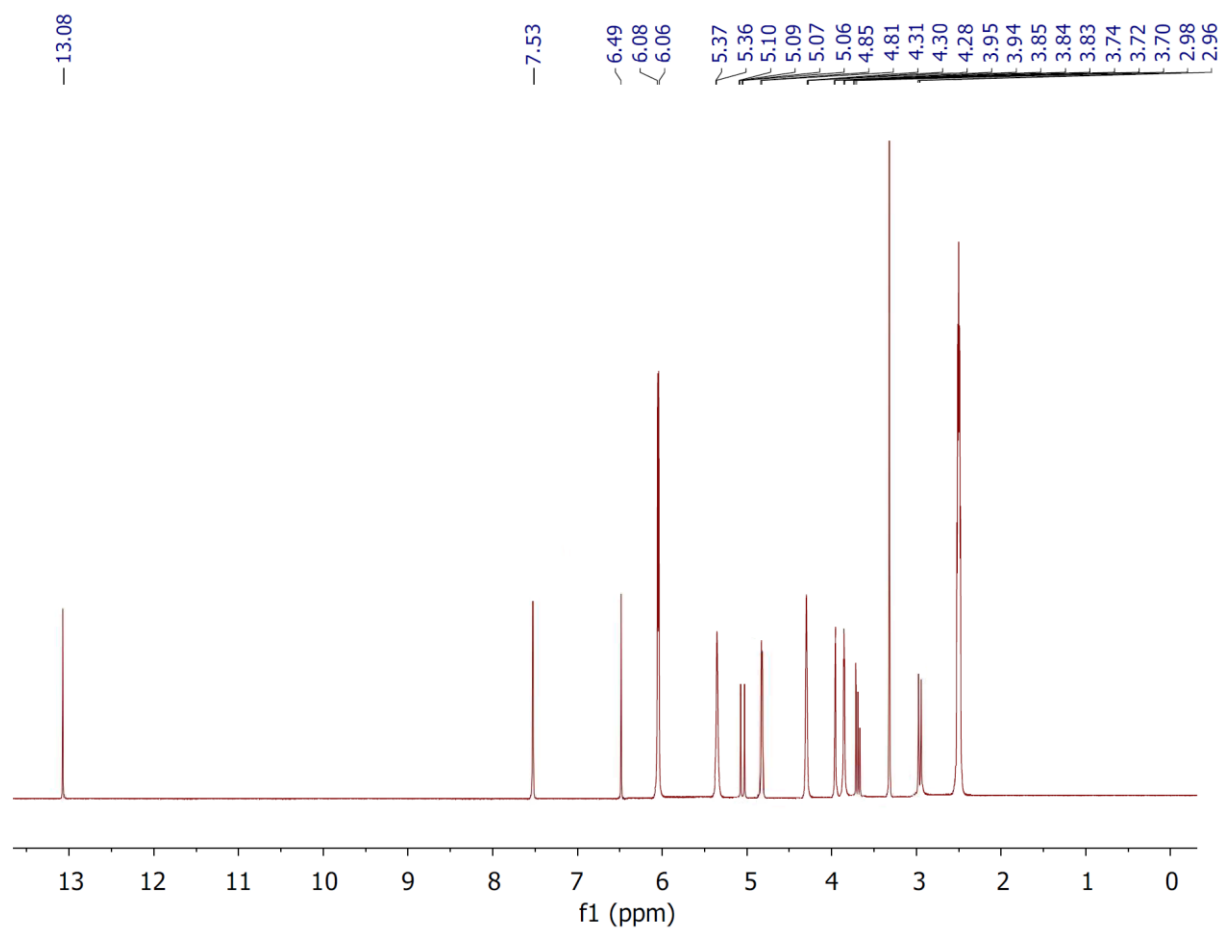

**Figure S36.**  $^{13}\text{C}$  NMR spectrum of compound **7**·(DMSO- $d_6$ ).

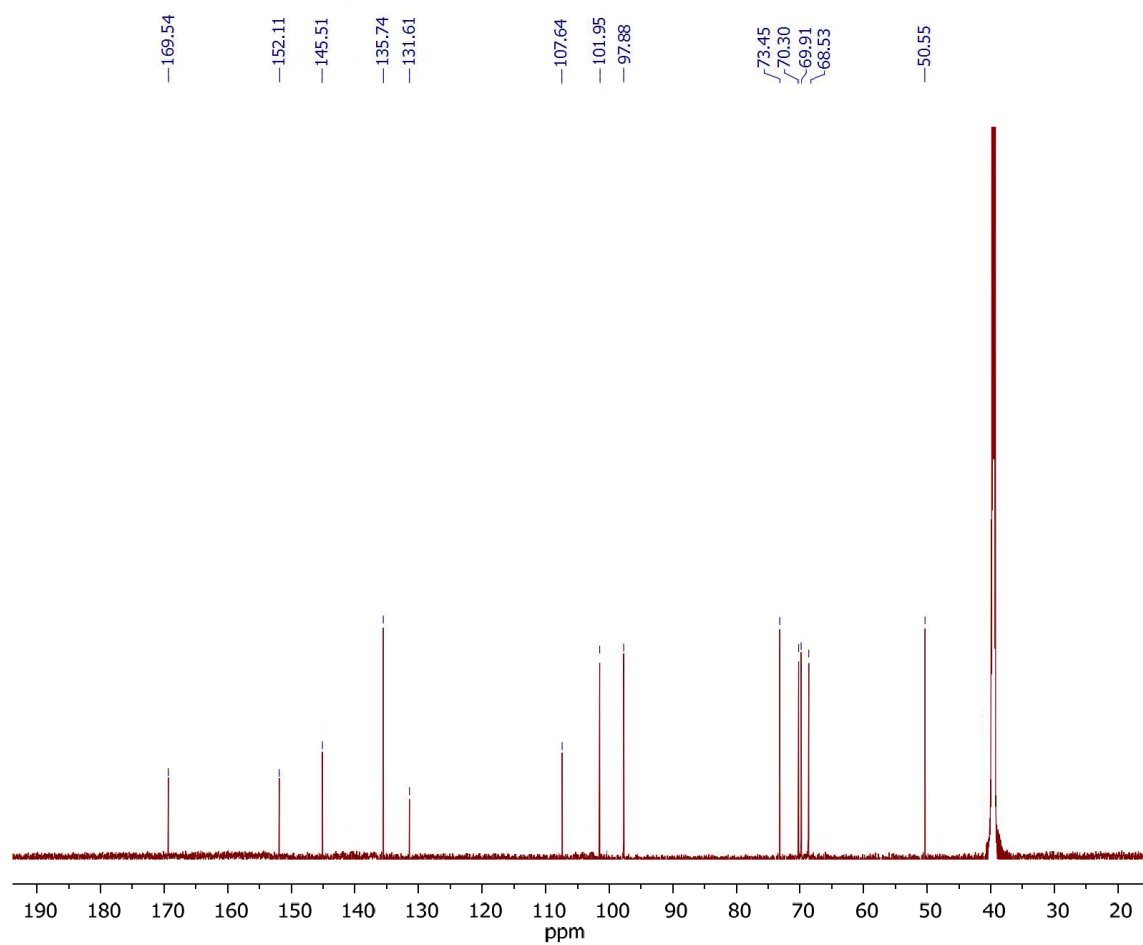

**Figure S37.** HPLC purification of Fraction C.

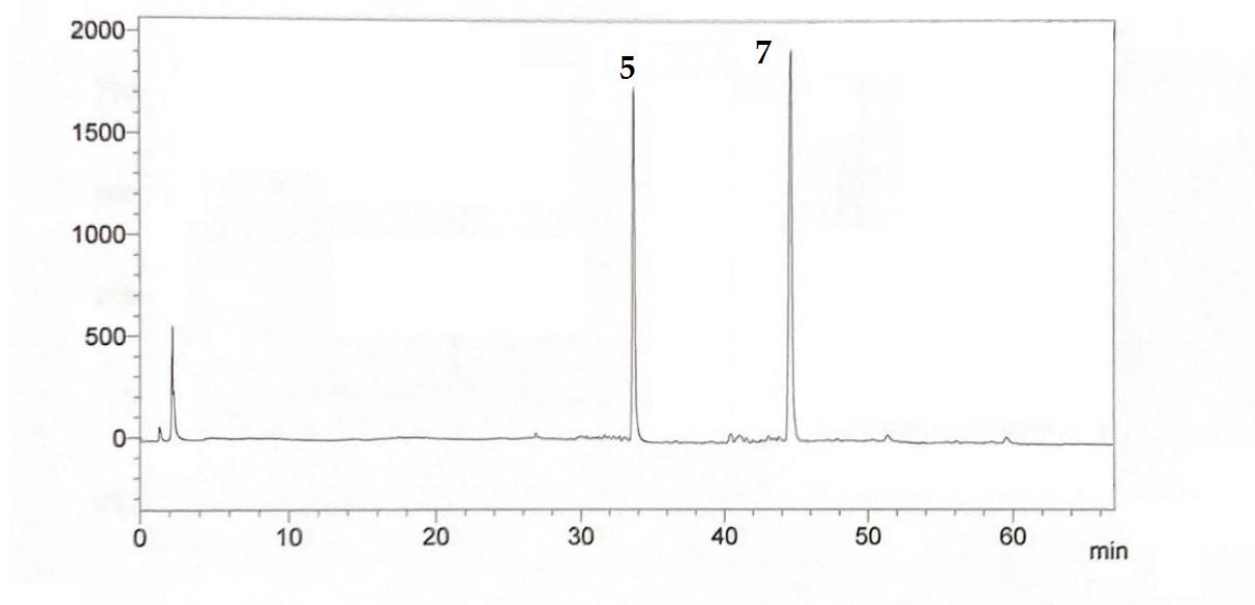

**Figure S38.** HPLC Purification of Fraction D.

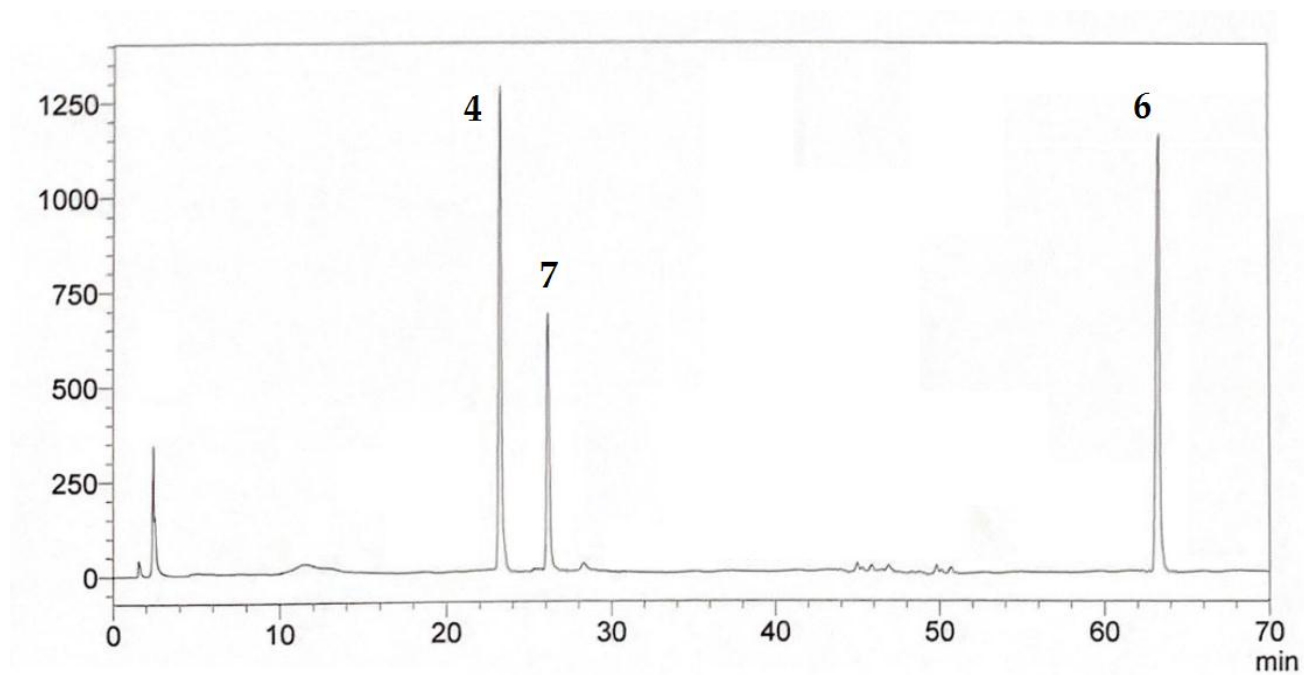

**Figure S39.** HPLC purification of Fraction E.

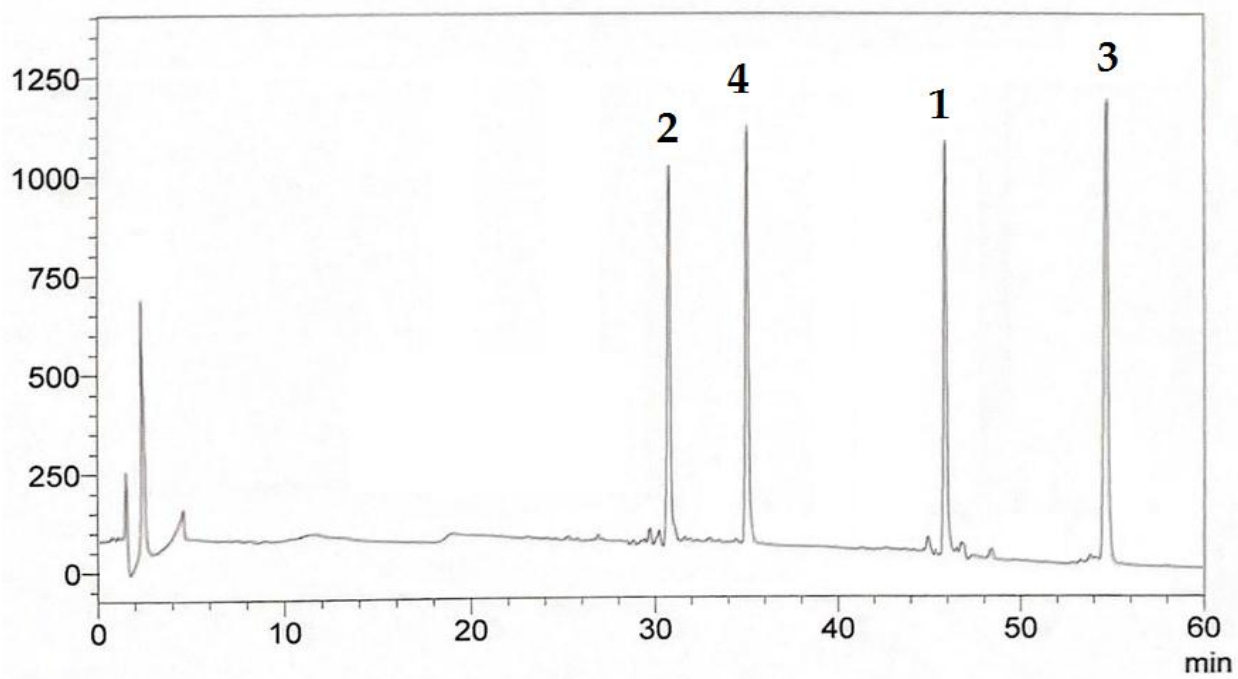

Supplement: s1 [file s1]
